# Supplementary material for: Combining Computed Tomography Radiomics and Clinical Features to Predict Lymph Node Metastasis in Patients with Lung Cancer
Source: Research Square preprint supplement (doi:10.21203/rs.3.rs-7815825/v1), 2025-10-31
Supplement: Supplementary file 1 [file 01857a7fa524510cc8a0936d.xlsx]

## Sheet: Sheet1
Serial number	Gender	Lymph node metastatic	Age	Smoke	Family history	T	M	Clinical stage	AFP	CEA	CA125	CA199	NSE	SCC	Pathological type	original	original	original	original	original	original	original	original	original	original	original	original	original	original	original	original	original	original	original	original	original	original	original	original	original	original	original	original	original	original	original	original	original	original
																shape	shape	shape	shape	shape	shape	shape	shape	shape	shape	shape	shape	shape	shape	firstorder	firstorder	firstorder	firstorder	firstorder	firstorder	firstorder	firstorder	firstorder	firstorder	firstorder	firstorder	firstorder	firstorder	firstorder	firstorder	firstorder	firstorder	glcm	glcm
																Elongation	Flatness	LeastAxisLength	MajorAxisLength	Maximum2DDiameterColumn	Maximum2DDiameterRow	Maximum2DDiameterSlice	Maximum3DDiameter	MeshVolume	MinorAxisLength	Sphericity	SurfaceArea	SurfaceVolumeRatio	VoxelVolume	10Percentile	90Percentile	Energy	Entropy	InterquartileRange	Kurtosis	Maximum	MeanAbsoluteDeviation	Mean	Median	Minimum	Range	RobustMeanAbsoluteDeviation	RootMeanSquared	Skewness	TotalEnergy	Uniformity	Variance	Autocorrelation	ClusterProminence
1	F	N	69	Y	N	T2	M0	IIIA							Adenocarcinoma	0.68498	0.481511	28.9014	60.0223	65.8896	91.3129	87.0073	95.243	34615.1	41.1141	0.353544	14528.4	0.419713	34791.3	-69	86	788806747	3.31047	65	6.68087	501	52.0606	14.5147	29	-289	790	28.4632	77.5068	-1.67246	2.09002e+08	0.135164	5796.63	183.429	2655.31
2	M	Y	74	N	N	T1	M1	IIIB		1.25	16.81			0.56	Adenocarcinoma	0.580569	0.571287	16.811	29.4266	38.7965	27.4983	37.9651	39.6263	4075.49	17.0841	0.417179	2957.66	0.725718	4266.26	-369	273	212736577	4.89149	177	3.49985	542	166.746	15.9126	55.5	-600	1142	96.8066	230.157	-0.829082	2.25994e+08	0.0484552	52719	719.282	106360
3	M	N	53	N	N	T1	M0	IA			0.95		11.04	0.78	Adenocarcinoma	0.842447	0.711745	10.5391	14.8074	20.9218	17.3318	20.3912	22.6248	1054.56	12.4744	0.588998	850.648	0.806641	1084.81	-250.1	174.2	24065870	4.5744	198.75	2.95186	442	127.927	-4.08571	29	-399	841	85.774	162.622	-0.513809	2.86888e+07	0.0509914	26429.3	305.733	21002.1
4	F	N	48	Y	N	T1	M0	IA		3.43	6.32		12.69	0.95	Adenocarcinoma	0.82373	0.764648	13.5057	17.6626	26.9301	24.6042	18.5719	27.5294	2158.01	14.5492	0.567591	1422.82	0.659322	2223.57	-107	158	35538644	4.04093	131.75	2.95719	345	80.3547	29.4851	29	-199	544	54.8728	106.285	0.172091	2.51184e+07	0.0705357	10427.1	100.575	3564.32
5	M	N	51	N	N	T1	M0	IA							Adenocarcinoma	0.828077	0.50874	5.8515	11.5019	12.3793	13.1864	13.5075	15.9457	242.921	9.52449	0.413208	455.644	1.87569	259.621	-688	-349.3	138340105	4.12153	174.75	3.94276	-63	109.26	-547.565	-592.5	-707	644	76.3984	564.585	1.16972	8.27558e+07	0.0716409	18929.1	82.0458	23189
6	F	N	37	N	N	T1	M0	IB							Adenocarcinoma	0.644261	0.456902	6.59156	14.4266	12.9043	15.9381	13.2068	17.8325	407	9.2945	0.521063	509.711	1.25236	420.786	-441	1.8	65074173	4.60103	257.25	2.48144	402	140.332	-237.053	-262.5	-489	891	105.486	290.333	0.516259	3.54693e+07	0.0449274	28098.8	156.762	28722.5
7	M	N	53	N	N	T1	M0	IA		0.62	19.5		9.33	0.42	Adenocarcinoma	0.789086	0.754824	14.964	19.8245	21.3789	22.6968	23.305	24.749	3062.56	15.6432	0.648855	1571.79	0.513226	3097.49	-41	179	57046201	3.81101	106	4.13424	496	68.4192	63.7591	54	-119	615	45.4132	109.647	0.774851	3.72392e+07	0.0857383	7957.16	65.0946	2869.29
8	M	Y	44	Y	N	T1	M0	IIIA	2.76	10.88	11.89	9.28	14.85	0.74	Adenocarcinoma	0.37748	0.325346	45.408	139.568	80.3207	152.929	86.4854	158.123	111999	52.6843	0.139407	80601.6	0.719661	113092	-734	97	32060476616	5.14643	634	1.5246	362	300.815	-260.933	-131	-800	1162	259.707	419.086	-0.307462	1.98628e+10	0.0333828	107548	685.392	539393
9	F	N	71	N	N	T1	M0	IA		1.26	18.89		9.3	0.76	Adenocarcinoma	0.910498	0.6959	14.111	20.2773	25.9752	23.2729	25.3226	27.8866	3060.51	18.4624	0.441617	2308.34	0.754235	3127.98	-532.1	78.1	483066676	5.027	388	1.90473	328	195.556	-230.352	-247	-600	928	155.545	322.66	0.157874	3.25651e+08	0.031957	51047.3	326.624	110362
10	M	N	59	N	N	T1	M0	IA		1.34	5.32		10.92	0.81	Adenocarcinoma	0.577553	0.355449	23.5331	66.2067	49.8204	79.8409	58.2837	80.4969	29674.2	38.2379	0.507743	9129.06	0.307643	29808.3	20	179	504699574	3.58837	76	34.9846	710	59.1806	95.0191	99	-1024	1734	32.3122	142.07	-3.44249	6.01649e+08	0.115021	11155.3	2080.5	32476.4
11	F	Y	81	Y	N	T2	M0	IIIA		1.32	81.66		11.27	0.67	Adenocarcinoma	0.769293	0.423573	73.4546	173.417	196.958	193.831	164.178	214.516	866912	133.408	0.171813	255904	0.29519	866793	-69	140	21726125229	3.86925	107	14.9395	788	70.2178	34.04	37	-746	1534	44.9006	108.226	-1.02754	1.01526e+10	0.0860798	10554.1	1022.28	33813.1
12	M	N	58	Y	N	T1	M0	IB		2.6					Squamous cell carcinoma	0.59833	0.434895	30.3451	69.7757	82.717	63.8157	72.6968	85.4214	46927.4	41.7489	0.317249	19832.1	0.422612	47138.2	-117	125	2315451223	4.10893	116	10.5639	1585	89.9619	-1.08639	20	-1023	2608	49.0244	138.953	-2.00497	9.10135e+08	0.0776313	19306.6	1770.86	59595.4
13	M	N	78	N	N	T1	M0	IA		0.82	7.58		9.5	1.15	Adenocarcinoma	0.824933	0.66285	30.2317	45.6087	53.0747	53.7883	55.0746	58.8127	28566.9	37.6241	0.347442	13007	0.455317	28943.3	-198	145	1045307942	4.33458	122	6.19847	444	110.739	1.84909	36	-600	1044	55.8044	164.749	-1.59542	7.8559e+08	0.0707319	27139	652.736	58370.4
14	M	N	52	N	N	T1	M0	IA		2.86	28.92		11.86	0.5	Adenocarcinoma	0.764384	0.754372	24.4486	32.4092	36.5342	38.3691	36.8563	42.1021	12307.9	24.7731	0.486895	5294.67	0.430183	12511.3	-31	198	252613953	3.83545	85	6.01331	546	72.3219	64.0249	47	-200	746	39.0525	123.494	1.22688	1.90807e+08	0.100101	11151.6	122.421	8537.7
15	F	N	46	Y	N	T1	M0	IA		0.62	3.65		10.98	0.43	Adenocarcinoma	0.580569	0.571287	16.811	29.4266	38.7965	27.4983	37.9651	39.6263	4075.49	17.0841	0.417179	2957.66	0.725718	4266.26	-369	273	212736577	4.89149	177	3.49985	542	166.746	15.9126	55.5	-600	1142	96.8066	230.157	-0.829082	2.25994e+08	0.0484552	52719	719.282	106360
16	M	N	59	Y	N	T1	M1	IA		1.88	10.88		12.83	0.38	Adenocarcinoma	0.725499	0.477313	8.24762	17.2793	16.096	21.2399	22.2017	23.1543	554.441	12.5361	0.330456	987.661	1.78136	599.147	-8.7	212	10146345	3.69339	120	6.56496	625	71.5572	95.8138	78	-29	654	48.1532	134.127	1.43154	1.07786e+07	0.0913372	8809.68	40.1105	5900.5
17	F	N	34	N	N	T1	M0	IA		0.77	19.98		6.98	0.56	Adenocarcinoma	0.884868	0.808576	5.88192	7.27442	8.31767	8.8201	8.6735	10.7059	171.809	6.4369	0.712336	209.812	1.22119	179.297	-547.2	-129.8	57692582	4.47839	244	2.10802	45	128.163	-333.986	-330	-588	633	98.3881	366.717	0.116025	2.41122e+07	0.048462	22934.9	166.189	16194.2
18	M	Y	58	Y	N	T3	M0	IIIA		6.8	14.78	35.4			Adenocarcinoma	0.751196	0.678082	15.6548	23.0869	25.6332	27.757	26.9259	27.8335	3735.37	17.3428	0.561872	2072.06	0.554714	3778.3	-363	193	217808394	4.81106	205.5	3.63572	542	160.787	-10.6757	45	-599	1141	99.0142	212.863	-1.02238	1.71197e+08	0.0476526	45196.7	658.564	94754
19	F	Y	76	Y	N	T4	M1	IV	3.26	8.22		8.21	10.17		Adenocarcinoma	0.957562	0.830344	10.652	12.8284	16.7985	19.8033	16.8701	20.6397	1006.35	12.284	0.551958	879.851	0.874304	1032.98	-653	-227.6	315757407	4.55716	255	3.11626	306	134.553	-442.736	-444	-700	1006	101.215	472.054	0.483751	2.30185e+08	0.0465449	26819.9	160.224	31020.6
20	M	Y	75	Y	N	T2	M0	IA		438.86	139.25		10.78	0.87	Squamous cell carcinoma	0.869862	0.811649	43.0068	52.9869	66.2913	66.2545	63.9845	76.1986	67171.6	46.0913	0.297608	26851.2	0.399741	67657.8	-98	179	4262850607	4.2426	127	5.06512	547	91.3826	45.7905	58	-400	947	54.4664	135.653	-0.751478	1.24502e+09	0.0691445	16305	357.491	16825.6
21	F	Y	38	Y	N	T3	M1	IV		23.36	9.05				Adenocarcinoma	0.816753	0.659683	5.99445	9.08687	9.35819	10.128	10.1107	10.8097	190.596	7.42172	0.552767	289.746	1.52021	198.665	-552	-198.4	88036774	4.28324	174	3.30651	82	108.127	-390.854	-411	-585	667	76.667	413.455	0.801062	3.39608e+07	0.0584447	18178.1	99.7476	20292.1
22	M	Y	64	N	N	T3	M1	IV	1.35	1.77	15.51	13.8	12.87	6.56	Adenocarcinoma	0.84366	0.802082	14.4851	18.0594	24.7401	21.677	23.6155	25.2539	2268.73	15.236	0.489441	1705.98	0.751951	2353.97	-337.6	106	120786885	4.48881	210.5	2.78175	305	131.234	-63.7949	-16	-464	769	91.0226	174.758	-0.810033	7.18909e+07	0.0544357	26470.5	345.91	27651.5
23	M	Y	48	N	N	T4	M1	IV		22.69	319.65		64.84	0.36	Adenocarcinoma	0.777421	0.5249	25.2464	48.0974	47.3467	51.4355	62.1922	65.6136	16452.9	37.392	0.330254	9472.51	0.575734	16532.4	-142	146	1683035537	4.13534	121	4.44579	525	88.0828	19.8864	39	-374	899	52.5611	122.366	-0.983425	2.47548e+08	0.073618	14578	290.187	14176.7
24	M	Y	58	N	N	T2	M1	IB		2.87	764.36		14.61	2.06	Adenocarcinoma	0.808622	0.532198	9.19093	17.2698	19.8724	22.538	21.9914	23.1911	1252.32	13.9647	0.625148	898.765	0.717677	1266.99	-443	71.1	174737777	4.37274	231.25	3.05747	191	157.021	-96.9204	-12	-586	777	109.375	215.004	-1.13472	5.8569e+07	0.0682688	36833.4	508.887	66286.8
25	M	Y	47	Y	N	T3	M1	IV	1.98	2.73	20.91	8.32	13.83	1.05	Squamous cell carcinoma	0.70246	0.569812	23.1046	40.5478	39.3594	64.2884	43.4702	65.5412	16386.4	28.4832	0.50565	6170.07	0.376535	16532	-206	122	610164681	4.24051	134	3.96161	559	96.8858	-12.6165	12	-406	965	59.9802	130.203	-0.928513	2.80263e+08	0.0675708	16793.6	319.187	15659.2
26	M	Y	57	N	N	T3	M1	IV							Adenocarcinoma	0.66237	0.591846	36.7448	62.0852	66.7445	66.1102	50.1866	68.0596	63424.9	41.1233	0.407867	18857	0.297312	63847.8	-206	123	2696510688	4.33879	138	4.21987	505	100.259	-17.0552	4	-446	951	60.9012	137.273	-0.752645	1.20314e+09	0.0644169	18552.9	345.865	23457.4
27	F	N	64	Y	N	T3	M0	IIIA		1000				0.79	Adenocarcinoma	0.840031	0.389099	17.7357	45.5814	51.6486	56.2118	56.8235	64.7742	13758.4	38.2898	0.319061	8702.74	0.632541	13944.8	-304	168	902760575	4.67501	189	3.40255	545	134.865	-19.5185	16	-500	1045	86.2052	177.793	-0.818204	4.40801e+08	0.0489428	31229.4	442.4	43258.4
28	M	Y	73	N	N	T1	M0	IA		1.37	16.05		11.91	0.48	Adenocarcinoma	0.80109	0.651261	26.3487	40.4579	42.6936	48.8314	47.881	49.8645	23277.4	32.4104	0.573453	6875.06	0.295353	23494.5	-121	144	433726458	4.15274	122	5.00072	647	85.9964	17.5613	30	-400	1047	52.1267	120.161	-0.787571	3.39232e+08	0.0727109	14130.4	312.377	9176.16
29	M	Y	79	N	N	T2	M1	IB		1000	361.96	877.27	23.64	0.29	Adenocarcinoma	0.926599	0.819685	39.8532	48.6202	57.9783	64.4194	63.9981	65.9862	50568.8	45.0514	0.377254	17529.6	0.346648	51119.5	-164	166	1359068727	4.43783	149	4.8782	547	106.98	11.4521	30	-500	1047	63.8383	148.829	-0.96938	1.13231e+09	0.059783	22019	468.215	26098.5
30	M	N	70	Y	N	T3	M0	IIB		4.81	28.06		21.09	1.22	Adenocarcinoma	0.887019	0.820487	28.1273	34.2813	40.5145	42.8938	44.3109	45.8518	19647.1	30.4081	0.500219	7039.19	0.358281	19767.3	-110	94	632838026	3.69147	82	8.73094	361	73.66	-0.574925	25	-497	858	36.2034	114.368	-2.22492	2.58556e+08	0.108032	13079.7	448.401	19934.3
[truncated: 817 more columns]
