# Supplementary material for: Combining Computed Tomography Radiomics and Clinical Features to Predict Lymph Node Metastasis in Patients with Lung Cancer
Source: Research Square preprint supplement (doi:10.21203/rs.3.rs-7815825/v1), 2025-10-31
Supplement: Supplementary file 2 [file 93986fde066dcb858f9a1665.xlsx]

## Sheet: Sheet1
Serial number	Gender	Lymph node metastatic	Age	Smoke	Family history	T	M	Clinical stage	AFP	CEA	CA125	CA199	NSE	SCC	Pathological type	CK7	TTF-1	NapsinA	CK20	CK5/6	Ki-67	PCT	original	original	original	original	original	original	original	original	original	original	original	original	original	original	original	original	original	original	original	original	original	original	original	original	original	original	original
																							shape	shape	shape	shape	shape	shape	shape	shape	shape	shape	shape	shape	shape	shape	firstorder	firstorder	firstorder	firstorder	firstorder	firstorder	firstorder	firstorder	firstorder	firstorder	firstorder	firstorder	firstorder
																							Elongation	Flatness	LeastAxisLength	MajorAxisLength	Maximum2DDiameterColumn	Maximum2DDiameterRow	Maximum2DDiameterSlice	Maximum3DDiameter	MeshVolume	MinorAxisLength	Sphericity	SurfaceArea	SurfaceVolumeRatio	VoxelVolume	10Percentile	90Percentile	Energy	Entropy	InterquartileRange	Kurtosis	Maximum	MeanAbsoluteDeviation	Mean	Median	Minimum	Range	RobustMeanAbsoluteDeviation
1	M	Y	50	Y	N	T2	M0	IB		1.7			31.45	0.45	Adenocarcinoma								0.57467	0.341333	11.0397	32.343	40.3113	18.3576	39.2046	43.4626	1388.88	18.5866	0.351035	1714.92	1.23475	1453	-108	157	17589547	4.03611	126	3.73727	284	80.504	35.3372	50	-446	730	53.5738
2	F	Y	74	N	N	T1	M0	IIB							Squamous cell carcinoma	+	-	-			0.15		0.675405	0.564027	11.0352	19.5651	25.0599	22.3607	23.7697	25.0799	1316.88	13.2143	0.348207	1668.57	1.26707	1349	-148.2	67.2	11968886	3.77215	106	5.15299	200	66.7505	-34.8495	-26	-552	752	44.35
3	F	Y	44	N	N	T1	M1	IB		1.1	15.87		30.2		Adenocarcinoma	+	+	+		-			0.907643	0.596844	15.8026	26.477	31.5753	33.121	30.0832	36.2353	5537.33	24.0316	0.420182	3602.3	0.650548	5596	-79	110	53018002	3.74228	90	9.93891	321	65.264	15.5729	27	-673	994	38.2085
4	F	Y	59	N	N	T2	M0	IB		3.4	73.84		42.44	0.12	Adenocarcinoma	+	+	+		-	0.3		0.75308	0.681905	31.944	46.8453	50.01	55.3624	57.0088	58.5577	33286.6	35.2782	0.417978	11972.3	0.359672	33386	-135	90	344600025	3.51059	70	7.2882	219	68.2974	6.18975	33	-575	794	33.9564
5	M	Y	64	Y	N	T2	M0	IB		40.4			12.95		Adenocarcinoma	+	+	+	-	-	0.2	1.5	0.765737	0.656399	4.26282	6.49425	6.40312	7.2111	5.83095	8.12404	47.5	4.97289	0.499323	127.028	2.67426	56	-682	-475	18999550	3.43791	103	4.96066	-242	67.9464	-575.25	-579.5	-768	526	41.9298
6	M	Y	70	Y	N	T2	M0	IB							Adenocarcinoma	+	+	-		-	0.7		0.766052	0.612381	7.91198	12.92	18	15.2971	18.3848	19.9249	459.125	9.8974	0.514545	559.347	1.21829	468	-682	69	73260467	5.2986	515.5	1.93867	224	253.155	-269.105	-207	-982	1206	204.324
7	F	Y	80	Y	Y	T3	M0	IB	6	6.2	59.54	6.83	5.23	0.07	Adenocarcinoma	+	+	+		-			0.797822	0.736636	26.3736	35.8028	47.4342	44.2832	45.6508	50.1298	13484.6	28.5643	0.235162	11650.4	0.863979	13740	-554	65	1275484258	4.94641	409	2.03027	323	211.149	-187.434	-94	-980	1303	169.414
8	M	Y	51	Y	N	T1	M0	IB		4.5			26.52	0.43	Adenocarcinoma	+	+	+					0.766036	0.665174	55.3236	83.1716	93.0054	87.9204	103.465	112.089	190191	63.7125	0.465087	34388.3	0.180809	190684	-67	99	1159474702	3.53141	83	9.29443	718	54.8187	14.9891	20	-822	1540	35.0996
9	M	Y	73	Y	N	T1	M0	IIA		4		16.82	2.73	0.39	Adenocarcinoma								0.706896	0.572329	16.7182	29.2108	41.1096	28.6356	43.566	44.5646	3000.92	20.649	0.182547	5511.6	1.83664	3351	-673	-53	781885576	5.05291	299.5	2.8486	403	186.351	-425.056	-484	-957	1360	132.707
10	F	Y	56	N	N	T2	M0	IA		1	42.25		4.05	0.12	Adenocarcinoma	+	-	-	-		0.1		0.72083	0.547495	85.4981	156.162	202.252	198.313	170.88	228.013	871629	112.567	0.178249	247559	0.284019	832265	-101	91	7209929324	3.72773	99	12.6245	1025	64.4674	-6.07495	2	-977	2002	41.0502
11	F	Y	58	N	N	T3	M0	IIA	2.7	3.8	10.12	9.2	6.8	0.16	Adenocarcinoma								0.810826	0.749823	5.47711	7.30454	7.28011	10.0499	10.0499	10.0499	131.125	5.92271	0.723405	172.541	1.31585	140	-609.2	37.1	20621415	5.05204	401	2.02989	240	211.671	-291.379	-313	-788	1028	163.813
12	M	Y	54	Y	N	T1	M1	IB		46.5	41.55		133.41	0.19	Small cell lung cancer		+	-		+	0.7		0.851916	0.794752	34.256	43.1027	68.6222	52.7731	69.1158	72.0625	29336.3	36.7199	0.252115	18245.5	0.621941	29093	-306	96	855505856	4.27985	130	5.79755	286	116.955	-46.9303	0	-854	1140	63.8743
13	M	Y	60	Y	N	T2	M1	IV		1000	242.2	23.63	11.07	0.13	Adenocarcinoma								0.459057	0.370987	7.1554	19.2875	12.1655	18.0278	18.3848	21	334.583	8.85406	0.418417	557.029	1.66484	370	-196.1	107.1	6282642	4.22889	147	4.03112	202	95.7408	-36.5189	-20	-560	762	62.8796
14	M	Y	77	Y	Y	T2	M0	IA		417.3	295.18	77.85		0.47	Adenocarcinoma	+	+	-		-	0.4		0.566005	0.318275	17.3244	54.4321	41.4849	62.9682	52	79.1833	9055.88	30.8088	0.245305	8565.07	0.945802	9184	-125	129	129331532	4.11743	122	14.7547	1766	83.344	7.63916	18	-782	2548	51.7967
15	M	Y	69	N	N	T2	M0	IB		69.5	614.8	341.74			Adenocarcinoma								0.590429	0.327204	3.03104	9.26345	7.28011	9.05539	9.84886	10.6301	94.7917	5.46941	0.68946	145.822	1.53834	101	-878	-447	51933393	4.39705	203	4.07462	-132	127.987	-697.752	-743	-939	807	86.934
16	M	Y	60	Y	Y	T1	M0	IA		2.1	154.44				Adenocarcinoma	+	-						0.532976	0.299559	7.99985	26.7055	18.9737	27.0185	15.6205	28.4429	69.7083	14.2334	0.309699	264.485	3.79417	123	-276.6	77.8	3244309	4.38126	181.5	2.6749	262	110.396	-85.5528	-77	-395	657	75.9282
17	M	Y	73	Y	N	T1	M0	IA		62.4			11.74	1.27	Adenocarcinoma								0.824048	0.565917	13.9954	24.7305	39.0512	39.8497	37.5366	41.5933	2525.54	20.3792	0.333743	2687.25	1.06403	2696	-214.5	75	45045767	4.09337	107	5.78696	363	86.1822	-47.3134	-24	-639	1002	50.5511
18	F	Y	79	N	N	T1	M1	IA		5.7			17.98	0.31	Adenocarcinoma	+	+				0.3		0.594717	0.470414	13.9591	29.674	32.6956	28.8444	30.0832	33.7491	2727.25	17.6476	0.391808	2409.32	0.883425	2758	-76	121	20003538	3.71059	102	4.69614	436	62.6269	23.5083	28.5	-436	872	42.0641
19	M	Y	72	N	N	T1	M0	IB	5.4	152.9		5.63	13.44		Adenocarcinoma								0.645044	0.45137	17.731	39.2826	55.4437	34.3657	54.8179	60.7701	8030.79	25.339	0.258431	7504.31	0.934443	8250	-150	95	92600242	4.01342	124	4.96448	333	78.7413	-20.2288	-7	-615	948	51.8444
20	M	Y	28	N	N	T2	M0	IB		1.5			2.31	0.16	Adenocarcinoma								0.82458	0.650044	12.0193	18.49	21.2132	24.8395	21.1896	24.8596	1793.29	15.2465	0.513262	1390.74	0.775523	1848	-73	184.3	29842932	4.09606	126	6.31409	371	82.5517	61.7078	74.5	-622	993	53.5154
21	M	Y	79	N	N	T2	M0	IB							Adenocarcinoma								0.965246	0.710324	47.7957	67.2871	83.2166	77.666	77.201	92.1358	135989	64.9486	0.217689	58746.6	0.431997	129351	-86	117	899644487	3.73655	106	4.0765	567	63.7837	17.1633	21	-619	1186	43.893
22	F	Y	65	N	N	T1	M0	IA		0.6	153.54	111.42			Adenocarcinoma								0.779168	0.621849	37.686	60.6031	70.7248	82.365	84.119	84.214	63612.2	47.2201	0.346713	22226.7	0.349409	64110	-63	95	317400624	3.43099	81	7.51157	276	51.0015	15.4903	19	-630	906	33.7764
23	M	Y	74	Y	Y	T4	M0	IA							Small cell lung cancer	+	+	-			0.8		0.881822	0.768176	11.0418	14.3741	17.72	18.4391	21.9317	22.2935	1146.67	12.6754	0.555235	954.184	0.832138	1171	-126	96	10132852	3.78934	97.5	5.26048	257	68.1879	-3.57814	9	-435	692	42.4783
24	M	Y	72	Y	N	T1	M1	IA		77.1			6.58	2.81	Adenocarcinoma	+	+	-	-		0.4		0.458989	0.38189	10.8618	28.4422	23.0217	23.5372	21.4709	32.5269	1973.12	13.0547	0.416018	1828.7	0.926802	1950	-582	56	200083722	5.08167	380.75	2.22789	239	205.572	-212.077	-150	-927	1166	159.35
25	F	Y	67	N	N	T2	M0	IA		0.9			5.95		Adenocarcinoma								0.918976	0.718647	19.0255	26.474	40.1995	32.7567	39.0512	42.1545	4451.25	24.329	0.24035	5444.55	1.22315	4682	-643	-113.1	1018397435	4.94543	276.75	2.98447	292	164.468	-419.562	-463	-975	1267	116.241
26	M	Y	80	N	N	T2	M0	IB		1000			20.63	0.29	Adenocarcinoma	+	+	+		-	0.15		0.743901	0.650074	18.5418	28.5226	38.9102	34.4384	44.4072	47.2546	4513.83	21.218	0.343607	3844.02	0.851609	4669	-608.2	47	590608354	5.14503	449	1.85861	359	219.156	-252.739	-227	-926	1285	177.938
27	M	Y	49	Y	Y	T2	M0	IA		1000			86.14	28.42	Adenocarcinoma								0.647283	0.560981	57.4938	102.488	99.93	118.207	121.149	130.74	237565	66.3387	0.168034	110393	0.464685	220267	-70	104	1067935536	3.48138	93	2.88421	366	54.1386	17.7865	18	-344	710	38.4848
28	M	Y	86	Y	N	T2	M0	IB	2.1	1000					Adenocarcinoma	+	+	+			0.1		0.821924	0.722016	22.5503	31.2325	37.6563	37.3363	38.4708	41.7852	11746.2	25.6707	0.559674	4464.92	0.380117	11869	-65	100	72399830	3.52991	80	8.71573	336	54.2199	16.2288	19	-597	933	34.1105
29	F	Y	79	Y	N	T1	M0	IA							Adenocarcinoma	+	+				0.2		0.725288	0.423362	3.78674	8.94445	6.7082	10.4403	10.6301	11.225	72.4583	6.4873	0.547073	153.638	2.12036	88	-453.3	49.1	5884228	4.63205	292	2.40592	141	154.901	-176.659	-168	-610	751	112.875
30	M	Y	81	Y	N	T1	M1	IB	4	2	56.44	18.69	75.13	0.38	Small cell lung cancer	+	+	-		+	0.9		0.68992	0.226638	27.2253	120.127	107.299	119.708	127.142	136.037	103285	82.8777	0.0707987	150367	1.45584	93906	-88	108	560804556	3.66808	104	3.03962	349	61.1471	10.2815	10	-373	722	43.2004
31	F	Y	70	N	N	T2	M0	IB		27.2			6.85	0.54	Adenocarcinoma	+	+	+			0.4	2.02	0.870428	0.790795	41.2859	52.2081	61.131	77.1038	81.2712	85.3522	63302.2	45.4434	0.425323	18059.7	0.285294	62962	-74	119	459865718	3.70171	99	6.50809	338	62.0376	21.6553	26	-640	978	41.4187
32	M	Y	52	Y	Y	T1	M0	IB		239.7			23.85	0.64	Adenocarcinoma	+	+	-			0.2		0.903027	0.671229	14.2641	21.2507	34.2053	26.9258	26.4008	38.4708	2586.38	19.1899	0.38728	2352.81	0.909693	2654	-154	111	35707188	4.10968	128.75	5.62686	285	85.1933	-12.3188	3	-634	919	54.164
33	M	Y	78	Y	N	T1	M0	IB		18			73.25		Small cell lung cancer	+	-	-			0.8		0.634455	0.477111	23.4416	49.1324	44.4072	59.203	48.8774	61.0737	13057.1	31.1723	0.193066	13889.2	1.06372	13402	-178	100	191625380	4.07469	120	6.01481	381	86.1161	-19.4637	4	-808	1189	52.7236
34	F	Y	65	N	N	T3	M0	IB		8	116.8	11.99	201.3		Adenocarcinoma	+	+	+		-	0.5		0.693414	0.271173	5.22699	19.2755	19.4165	18.2483	21.095	22.1585	806.458	13.3659	0.607488	689.712	0.855236	822	-897.9	92.9	231896499	5.52295	756	1.51738	356	356.04	-360.483	-274	-1086	1442	305.105
35	M	Y	76	Y	N	T1	M1	IB	4.8	138.5	52.95	29.14			Adenocarcinoma	+	+	+		-	0.1		0.739097	0.49773	34.0756	68.462	95.8541	81.2219	80.0562	97.8008	50772.6	50.6001	0.129543	51186.7	1.00816	49212	-84	101	341435412	3.66475	95	7.54405	355	60.8804	9.24527	17	-820	1175	39.8113
36	M	Y	68	Y	N	T1	M0	IB		1.4			58.23	0.19	Adenocarcinoma								0.616256	0.373484	29.9675	80.2378	82.7345	72.0069	89.1964	91.4877	62257.5	49.447	0.183232	41458.2	0.665915	59639	-234	93	1065451149	4.233	148	3.74149	322	98.5167	-41.8477	-14	-717	1039	65.2552
37	F	Y	65	N	N	T2	M1	IV		2.3			5.89	0.2	Adenocarcinoma	+	+			-	0.2		0.97597	0.597945	12.8004	21.4074	28.0179	27.1662	30	32.187	2446.62	20.893	0.299647	2930.34	1.19771	2532	-659.9	-69	511547833	5.01163	347.5	2.04929	337	184.711	-393.877	-425	-868	1205	143.531
38	F	Y	52	N	N	T2	M0	IB							Squamous cell carcinoma								0.910215	0.497565	12.6363	25.3962	28.2312	31.1448	31.305	32.218	2692.17	23.116	0.40361	2318.77	0.861301	2733	-762	-178.2	872212007	5.00411	321	2.92844	221	183.254	-518.243	-569	-924	1145	132.188
39	M	Y	67	Y	N	T2	M0	IB	5	3.9	25.44	5.33			Squamous cell carcinoma	-	+	-	-	+	0.4		0.832468	0.689664	43.6664	63.3155	78.6003	87.8635	80.7775	95.8488	67653.2	52.7082	0.146859	54673.5	0.808144	68153	-27	124	418241935	3.35149	79	6.1154	463	48.3257	45.7652	44	-552	1015	32.7922
40	F	Y	69	N	N	T3	M0	IB							Adenocarcinoma								0.924894	0.650435	29.3728	45.1587	63.1269	57.7062	56.3028	63.1348	29149.3	41.767	0.225961	20270.8	0.695412	29844	-561	80	2967677999	5.056	434	1.97266	1089	220.049	-193.061	-112	-992	2081	178.212
41	M	Y	64	Y	N	T4	M1	IB		5.9			5.73	0.61	Squamous cell carcinoma	-	-	-			0.4		0.63472	0.585881	12.3592	21.0951	22.3607	25.0799	20.025	25.0799	1925.33	13.3895	0.555968	1346.19	0.699197	1954	-144.5	95	25409148	3.853	81	8.10307	258	73.6803	-16.8301	0	-666	924	37.3711
42	F	Y	78	N	N	T4	M0	IV							Adenocarcinoma								0.715197	0.56591	19.3687	34.2259	33.541	39.6989	35.1141	41.9166	8926.29	24.4782	0.454779	4575.77	0.512617	8982	-81	117	82461158	3.76861	95	8.49527	306	66.0863	18.8145	29	-709	1015	40.603
43	M	Y	57	Y	N	T1	M0	IB		0.8	23.92		26.48	0.24	Adenocarcinoma	+	+	+			0.5		0.673778	0.535994	53.0739	99.0195	88.0909	120.208	131.488	133.469	178001	66.7172	0.156178	97982.1	0.550458	166839	-67	89	751770206	3.38885	81	6.52129	515	49.9727	12.0624	16	-695	1210	33.746
44	M	Y	49	N	N	T2	M0	IA		76.7			36.33		Adenocarcinoma								0.580585	0.542283	14.8007	27.2934	57.3149	22.0907	44.4072	58.3181	1587.75	15.8461	0.318818	2064.41	1.30021	1696	-237	125.5	42323800	4.47206	159	5.18753	295	113.812	-33.763	-4	-798	1093	69.9685
45	M	Y	74	Y	N	T3	M0	IB		18			39.02	65.93	Squamous cell carcinoma	+	-	-			0.4		0.800649	0.735112	42.0279	57.1721	77.2334	67.0671	70.6824	77.8075	68366.1	45.7748	0.352694	22925.2	0.33533	69306	-71	93	600009920	3.57834	79	14.0541	575	59.2747	7.94583	20	-916	1491	33.1617
46	F	Y	63	N	N	T2	M1	IB		15.2					Adenocarcinoma	+	+	+		-	0.15		0.661974	0.386314	17.3955	45.0296	63.2456	42.5441	57.5587	66.8207	9164.75	29.8084	0.259279	8168.29	0.891272	9357	-517	58	805205619	4.99554	372	2.13426	338	191.274	-192.856	-146	-1025	1363	151.344
47	M	Y	83	N	N	T2	M0	IB		9.6	371.51	22.17		0.87	Squamous cell carcinoma	-	-						0.738096	0.444188	24.0278	54.0938	72.7324	52.2015	68.4251	75.5248	20788.6	39.9264	0.264227	13837.5	0.665629	20559	-94	93	148126842	3.67285	95	7.9723	330	61.5908	0.463933	8	-694	1024	39.7625
48	M	Y	71	N	N	T2	M0	IB							Adenocarcinoma	+	+	-					0.919932	0.453539	28.8314	63.5699	72.7324	81.9329	71.218	82.9578	35279.1	58.48	0.279262	18627.3	0.527998	35041	-42	117	184556736	3.36037	83	3.03739	243	49.3953	37.7637	39	-215	458	34.653
49	F	Y	46	N	N	T4	M1	IV	2.8	46.8	21.52	42.62			Adenocarcinoma	+	+	-			0.4	0.33	0.725235	0.657488	20.8833	31.7622	31.9531	36.7151	36.4005	40.2741	10042	23.035	0.543478	4141.74	0.412441	10105	-140	92	155472897	3.84164	86	9.61941	267	79.2079	-11.3679	14	-889	1156	38.5498
50	F	Y	51	Y	Y	T1	M0	IB		500		6.29	18.64		Adenocarcinoma	+	+	+			0.15		0.820865	0.677829	27.5202	40.6005	49.93	49.8197	51.1077	54.3047	23820.2	33.3275	0.43246	9257.67	0.388648	23868	-75	97	136686685	3.54428	85	6.25535	295	55.4004	12.0896	18	-592	887	36.0471
51	M	Y	68	Y	N	T2	M1	IB	2.9	331	204.9	1.59	6.73	0.11	Adenocarcinoma	+	+		-	-	0.5		0.809013	0.651453	18.1047	27.7912	39.6232	35.5106	43.8292	50.01	5003.96	22.4834	0.227389	6221.92	1.2434	5034	-121.7	86	41412309	3.78467	104	5.62503	243	67.1149	-13.7495	-2	-516	759	43.7226
52	M	Y	52	N	N	T1	M0	IA		41			6.07	0.63	Adenocarcinoma	+		+	-	-	0.5		0.615799	0.151664	8.4504	55.7177	76.0263	52.469	76.6877	80.2558	3900.79	34.311	0.25953	4617.41	1.18371	4136	-229	92.5	82756611	4.31083	146	4.58737	371	100.174	-48.6057	-22	-762	1133	63.8652
53	M	Y	81	Y	N	T1	M0	IB				2	7.13	0.34	Adenocarcinoma								0.761776	0.526978	22.0116	41.7694	39.2173	60.407	60.4152	62.7853	16128.3	31.8189	0.459273	6721.59	0.416758	16283	-44	90	73093143	3.2519	65.5	9.76716	310	44.7497	21.1405	24	-629	939	28.0083
54	F	Y	45	N	N	T1	M0	IIA		40.3	74.24	5.72		6.79	Adenocarcinoma	+	+	+		-	0.1		0.86217	0.783035	33.5774	42.8811	60.208	72.1249	64.195	75.9276	28124.6	36.9708	0.251983	17748.9	0.63108	27137	-91	117.4	207016658	3.78567	109	5.09141	410	66.3724	14.7505	20	-624	1034	45.3557
55	M	Y	75	Y	N	T2	M0	IB		49.5			12.99		Adenocarcinoma								0.712944	0.652557	45.6519	69.9584	90.4268	80.5233	83.2406	91.6406	87826.3	49.8764	0.194348	49164.8	0.559796	81744	-71	110	504003187	3.59399	94	6.14929	609	57.8157	20.8531	25	-660	1269	39.4286
56	M	Y	71	Y	Y	T1	M1	IV		500	55.28		300	0.69	Adenocarcinoma					-	0.5		0.6661	0.541429	34.1839	63.1364	86.3539	59.0931	69.029	87.3785	55207.4	42.0552	0.431253	16258.6	0.294501	55478	-61	91	308531025	3.42477	76	10.8502	336	51.1836	12.6211	18	-725	1061	31.9898
57	M	Y	48	Y	N	T1	M0	IB		7.4	34.05		25.43	0.96	Small cell lung cancer	-	+	-			0.8		0.875539	0.431477	10.6995	24.7974	31.5753	25.318	29.5466	31.6544	3565.75	21.711	0.469334	2404.93	0.674453	3559	-494.2	82	236017911	4.8938	294	2.74883	285	175.926	-142.316	-79	-773	1058	126.023
58	M	Y	56	Y	N	T2	M1	IB	3.4	6.6	24	56.47		17.65	Squamous cell carcinoma	-				+	0.4		0.667626	0.323974	20.1187	62.0998	65.3682	79.1202	64.1249	89.9444	13000.2	41.4594	0.125903	21236.4	1.63355	13795	-205	88	272232084	4.12113	115	7.52197	443	94.7606	-31.548	1	-922	1365	51.9286
59	M	Y	79	N	N	T4	M1	IV							Adenocarcinoma	+	+	+		-	0.3		0.891639	0.862471	51.3827	59.5762	78.6448	75.1066	72.4224	79.2591	105470	53.1204	0.33033	32680.4	0.309856	105609	-49	101	547297624	3.35786	75	8.42993	710	48.7771	26.8651	32	-740	1450	31.5832
60	F	Y	68	N	N	T1	M0	IB		2.1	341.74	5.72			Adenocarcinoma	+	+	+				0.28	0.631049	0.5731	14.1044	24.6107	29.4109	23.8537	26.4197	31.4643	2837.54	15.5305	0.396763	2442.95	0.860939	2883	-99	109	25521419	3.83891	105	6.51415	287	69.2503	5.44745	16	-598	885	44.7083
61	M	Y	76	N	N	T1	M1	IA		199.3	82.35	72.57			Adenocarcinoma	+	-	+	+		0.1	0.11	0.723139	0.600146	12.5557	20.921	22.2036	27.0185	25.02	27.8747	1140.71	15.1288	0.284128	1858.17	1.62896	1286	-137	73	12139774	3.67488	83	7.45518	260	66.2347	-14.6159	3	-521	781	37.0191
62	M	Y	51	Y	N	T1	M0	IB		10.5			5.15		Adenocarcinoma	+	+	+	-	-	0.1		0.415434	0.40402	10.1761	25.1872	16.7631	31.0161	24.1661	34.0735	744.667	10.4636	0.279252	1422.75	1.91059	819	-642.4	-182.4	197821512	4.7318	222.5	3.81363	257	145.442	-454.833	-499	-838	1095	98.0028
63	F	Y	57	N	N	T3	M0	IB	3.2	8.8	20.07	12.85	5.73	0.12	Adenocarcinoma	+	+	+			0.5		0.333347	0.314141	23.3528	74.3384	49.7293	76.4003	40.2616	77.7239	18282.2	24.7805	0.309465	10844.9	0.593194	18673	-71	99	121138142	3.56378	84	9.16812	368	56.3657	13.3951	20	-652	1020	35.4005
64	F	Y	54	N	N	T2	M0	IB							Adenocarcinoma	+	+	+		-	0.5	4.68	0.81259	0.426123	8.69825	20.4125	21.4009	20.1246	22.8035	25.1794	1677.67	16.587	0.533367	1280.15	0.763055	1696	-639	-125.5	330272152	4.93505	274.25	2.58623	199	156.464	-397.466	-415.5	-897	1096	113.078
65	M	Y	56	N	N	T4	M1	IB			11.3		3.77	0.06	Adenocarcinoma	+	+	+		-	0.2		0.891216	0.846685	38.7514	45.7684	60.1332	80.2621	65.192	86.5852	42778.9	40.7895	0.426481	13869.8	0.324221	43280	-67	115	342928717	3.67087	91	9.89989	482	60.8257	21.8393	28	-774	1256	38.4961
66	M	Y	67	N	N	T2	M1	IV	3.9	4.4	10.9	6.53			Adenocarcinoma							0.05	0.709648	0.497667	14.5461	29.2286	39.8121	41.7852	38.6264	44.5197	4874.79	20.7421	0.534876	2599.37	0.533228	4951	-133	66	47706993	3.69617	82	7.58328	231	65.1696	-23.8241	-8	-606	837	36.4404
67	M	Y	74	N	N	T3	M1	IV							Adenocarcinoma								0.90597	0.830324	21.5822	25.9925	31.1448	31.4006	34.1321	38.4448	6052.33	23.5485	0.387373	4146.07	0.685036	6132	-71	179	99431698	3.91032	101	5.80657	379	76.1048	73.0476	94	-581	960	46.2283
68	F	Y	56	N	N	T4	M0	IB		186.6		106.65	26.52		Adenocarcinoma								0.675944	0.553862	25.56	46.1488	46.4004	55.1725	46.6154	60.0417	21534	31.194	0.290885	12868.1	0.597569	20935	-95.6	101	136009345	3.70281	102	4.62842	324	62.2763	4.59981	9	-705	1029	42.544
69	F	Y	70	N	N	T2	M1	IV	3.1	3.7	12.29	12.59			Adenocarcinoma								0.68036	0.565948	12.1182	21.4122	20.6155	26.0768	24.0208	26.1916	1875.54	14.568	0.363766	2021.84	1.078	1915	-589.6	-109	339442225	4.82702	254	2.93681	256	149.327	-378.154	-412	-804	1060	105.314
70	M	Y	80	N	N	T4	M0	IA		4.1	722.4		15.43	0.25	Adenocarcinoma	+	+	+		-	0.5		0.935147	0.873127	37.2018	42.6076	56.6617	64.8128	61.9808	65.4765	42680.7	39.8444	0.353599	16703	0.391347	43044.7	-184	117	2545934179	4.15409	124	4.87067	247	93.265	-14.4913	9	-450	697	54.686
71	M	Y	65	Y	N	T4	M0	IIB		5	6.89		6.88		Adenocarcinoma	+	+			-	0.8		0.687406	0.667505	54.6677	81.8986	98.8026	86.4179	89.3188	110.304	160953	56.2976	0.29537	48445.3	0.300989	161749	-66	113	3570281420	3.5764	92	4.35753	647	56.5353	24.9389	26	-200	847	38.3317
72	F	Y	74	N	N	T4	M0	IIB		9	315.4		12.92	3.43	Adenocarcinoma	+	+	+		-	0.2		0.687037	0.222601	11.6099	52.1556	51.9929	50.6314	65.8858	66.7843	13535.3	35.8328	0.339264	8095.76	0.598122	13436.7	-178	144	834146330	4.3784	161	4.3302	257	102.466	-13.3726	1	-530	787	67.6681
73	M	Y	77	N	N	T3	M0	IB		8			15.47		Adenocarcinoma	+	+	+		-	0.2		0.518571	0.195654	21.8056	111.45	76.7812	121.335	124.435	130.838	48392.5	57.7947	0.0879475	73020.8	1.50893	43435.7	-32	159	1191241275	3.44074	108	2.30143	231	58.699	57.607	50	-55	286	44.219
74	M	Y	48	N	N	T4	M0	IB		30.3			10.77	0.09	Adenocarcinoma	+	+	+		-	0.2		0.801893	0.619331	44.0141	71.0672	78.4559	89.9496	107.903	110.102	88836.9	56.9883	0.296127	32513.9	0.365995	88907.9	11	59	354522932	1.76903	26	4.15444	183	15.2104	34.77	35	-122	305	10.5631
75	F	Y	76	N	N	T2	M1	IV		2	13.05		9.99	1.87	Adenocarcinoma	+	+	+		-	0.2		0.889375	0.785967	32.5109	41.3642	51.1957	52.0674	51.711	59.0504	32081.5	36.7883	0.296459	16469.8	0.513375	31680.9	-261	129	2115055322	4.50253	185	3.54054	215	118.759	-44.1088	-19	-511	726	78.9607
76	F	Y	63	N	N	T2	M0	IIB		232.9				0.2	Adenocarcinoma	+	+	+		-	0.3		0.44062	0.239152	20.7533	86.7787	61.8282	75.0622	63.1931	80.3603	11217.2	38.2364	0.141692	17102.7	1.52468	11387.6	-91	126	322312910	3.7511	112	4.64364	557	67.9132	15.4149	7	-130	687	46.8722
77	F	Y	76	N	N	T3	M0	IB		2.8					Adenocarcinoma	+	+	+		-	0.2		0.842319	0.671322	21.9683	32.7239	51.0042	46.0433	46.9541	52.7903	9198.98	27.564	0.24088	8814.08	0.958159	9313.36	-133	116	270039842	3.91918	105	3.83607	497	72.8363	3.2528	7	-225	722	46.3664
78	M	Y	56	N	N	T4	M1	IV		11.1	96.16		18.4	0.17	Adenocarcinoma	+	+	+		-	0.1		0.728306	0.426707	41.6602	97.6317	98.4686	127.263	114.711	128.205	158132	71.1058	0.169684	83340.6	0.527031	158618	-314	110	13907643113	4.33571	144	4.06482	288	119.51	-39.4988	6	-519	807	71.49
79	M	Y	85	Y	N	T4	M0	IIB		11.7	108.2		12.12	1.61	Adenocarcinoma	+	+	+		-	0.1		0.871545	0.653114	28.2012	43.1797	55.8171	47.9038	50.8788	56.5054	29244.6	37.633	0.516942	8879.86	0.303641	29329.6	-56	105	636251987	3.46354	81	4.02584	486	51.6244	24.8292	26	-192	678	33.9827
80	M	Y	74	N	N	T4	M1	IV					9.87	0.54	Adenocarcinoma	+	+	-		-	0.8		0.520592	0.458959	15.5264	33.8297	37.9153	27.6524	37.3857	42.3761	3887.32	17.6115	0.353893	3378.41	0.869083	3940.99	-447	115	753602750	4.85965	310	2.2941	329	174.574	-109.785	-47	-556	885	130.183
81	M	Y	77	N	N	T4	M0	IIB		146.8			40.5	0.94	Adenocarcinoma	+	+	+		-	0.1		0.885269	0.769768	14.1591	18.394	29.9241	24.9548	28.2643	32.3672	2414.43	16.2836	0.4428	1965.56	0.814088	2468.41	-396	116.2	376077188	4.63926	246	2.55623	321	151.924	-78.7492	-24	-500	821	108.185
82	F	Y	77	N	N	T4	M0	IIIC		2.2	6.46		7.08	0.53	Adenocarcinoma	+	+	+		-	0.6		0.817679	0.690752	4.78447	6.92647	6.53264	6.71754	6.53651	6.75485	6.83197	5.66363	0.247591	70.3256	10.2936	20.0561	63	852	15100915	4.77957	506	1.74162	932	250.307	428.158	409	5	927	201.932
83	M	Y	80	N	N	T3	M0	IIB		2.9			10.43	0.37	Adenocarcinoma	+	+	+		-	0.5		0.557741	0.45048	16.0769	35.6884	31.6274	37.9022	36.0064	42.6252	5804.26	19.9049	0.368209	4241.84	0.730814	5927.24	-527	105	1306219837	4.9183	440	1.68046	311	208.632	-229.746	-266	-571	882	174.019
84	F	Y	71	N	N	T4	M1	IV	0.6	8.2	91.22	2			Adenocarcinoma	+	+	+		-	0.1		0.819434	0.476112	16.6248	34.9179	47.1952	39.8241	46.2892	48.6468	9269.58	28.6129	0.422447	5051.49	0.544953	9326.4	-227	95	494169255	4.08428	113	4.81454	270	94.1177	-27.269	4	-459	729	53.1521
85	F	Y	72	N	N	T4	M1	IV		95.5	19.48	2	9.09	0.22	Adenocarcinoma	+	+	+		-	0.3		0.632817	0.403693	13.6925	33.9182	41.6029	27.1342	41.8481	43.5588	5982.78	21.464	0.405099	3934.22	0.657591	6029.8	-198	139	428319360	4.37417	144	5.17466	338	106.984	-10.8852	17	-553	891	63.0301
86	M	Y	59	Y	Y	T2	M0	IIB	6.6	8.23			11.29	0.7	Adenocarcinoma	+	+	+		-	0.2		0.764653	0.615242	2.3765	3.86271	3.75	3.81477	4.37321	4.37321	9.08906	2.95363	0.620941	33.9193	3.73188	11.4187	-182.6	50.6	383931	3.43663	123	2.33716	126	73.4982	-74.4483	-67	-199	325	55.5085
87	M	Y	56	Y	N	T4	M1	IV		3.4		345.5	56.26	0.52	Adenocarcinoma	+	+	+		-	0.01		0.864962	0.820364	12.199	14.8702	19.3033	21.5338	15.1798	21.5841	1485.98	12.8622	0.569079	1106.59	0.744686	1516.2	-532	83	278004977	4.7423	308.5	2.5723	284	190.23	-131.507	-40	-655	939	137.912
88	M	Y	81	Y	N	T4	M1	IV		56.31		426	28.12	0.36	Adenocarcinoma	+	+	+		-	0.7		0.72698	0.502211	5.25826	10.4702	13.3245	11.3348	8.99127	13.3945	73.2104	7.61164	0.392967	215.366	2.94174	83.6468	-487.2	-250.4	28943304	3.52731	119.5	13.3742	310	77.4656	-386.659	-411	-500	810	48.8783
89	F	Y	78	N	N	T4	M0	IIB		119.4			7.88	0.56	Adenocarcinoma	+	+	+		-	0.3		0.628184	0.369958	16.7261	45.2107	37.95	45.8757	49.2235	51.6027	9854.74	28.4006	0.296093	7507.35	0.7618	9889.95	-452	221	1468271504	5.10689	437	1.85111	406	222.471	-70.801	-3	-550	956	178.526
90	F	Y	59	N	N	T2	M0	IIB		11.5			10.07	0.17	Adenocarcinoma	+	+	+		-	0.1		0.703936	0.691415	14.5145	20.9924	24.6297	24.8611	34.5063	35.0913	2127.09	14.7773	0.351417	2276.07	1.07004	2124.35	-447	77	308517481	4.776	324	1.84913	172	163.329	-178.662	-170	-508	680	129.809
91	M	Y	56	Y	N	T4	M1	IV		4.7			14.01	0.34	Adenocarcinoma	+	+	+		-	0.1		0.691663	0.607838	40.5318	66.6819	75.4648	71.8327	88.0377	88.707	59561.7	46.1213	0.231233	31896.7	0.535524	60135	-236	156	3358856042	4.31189	131	5.35718	271	113.621	7.08116	46	-555	826	61.6958
92	F	Y	76	N	N	T4	M0	IIB		273.1	363.8		27.76	0.27	Adenocarcinoma	+	+	+		-	0.05		0.873432	0.739935	18.7568	25.3493	33.3127	37.3366	50.125	51.7899	4959.16	22.1408	0.317036	4435.88	0.894484	5013.62	-405	97	1174224643	4.73031	295	2.09386	247	157.698	-116.674	-74	-500	747	121.053
93	M	Y	70	N	N	T1	M0	IIB	3.2	2.9	11.51	19.5			Squamous cell carcinoma	+	+	+		-	0.3		0.585151	0.474105	34.5303	72.8326	71.5115	96.2671	89.4806	103.593	52692.9	42.6181	0.272464	24946.5	0.473432	52864.9	-86	139	1710045569	3.87687	117	3.16778	395	70.3185	28.2365	29	-217	612	48.5091
94	M	Y	72	Y	N	T4	M0	IB		12.1			10.26	0.62	Adenocarcinoma	+	+	+		-	0.05		0.761531	0.542044	39.6711	73.188	85.1619	79.3248	88.2314	104.559	93113.1	55.735	0.295366	33635.5	0.361233	93955.4	-228	147	5942539081	4.54369	165	4.5277	487	117.581	-21.3508	3	-553	1040	71.5821
95	M	Y	71	N	N	T4	M0	IIB		2.3	35.41		8.92	0.33	Adenocarcinoma	+	+	+		-	0.7		0.792064	0.707817	42.0096	59.351	80.3393	83.2747	81.1645	87.1189	75314.1	47.0098	0.311255	27708.8	0.36791	76010	-249	111	5763357605	4.05018	100	6.63723	347	106.792	-15.8212	27	-600	947	48.856
96	F	Y	60	N	N	T2	M1	IV		1	26.58		12.42	0.58	Adenocarcinoma	-	+	-		-	0.7		0.612014	0.411307	11.1801	27.1818	25.4326	23.2386	27.0503	34.2241	518.547	16.6357	0.230311	1355.28	2.61361	570.898	-511	104.9	219359299	4.87783	418.75	1.78888	247	202.074	-230.891	-269.5	-550	797	164.855
97	M	Y	77	Y	N	T3	M1	IV	1.6	308	66.68	2			Adenocarcinoma	+	+	+		-	0.7		0.888563	0.668701	5.71181	8.54165	9.884	11.2641	11.0778	11.4739	160.795	7.58979	0.486865	293.713	1.82663	173.661	-372	55.8	20262291	4.47668	235	2.2101	212	130.335	-173.676	-185	-406	618	99.9923
98	F	Y	68	N	N	T3	M0	IB		1000			13.82	0.32	Adenocarcinoma	+	+	+		-	0.5		0.859927	0.710828	25.5599	35.958	44.644	45.9848	47.9883	50.116	16334.9	30.9213	0.335808	9271.23	0.567572	16503.1	-179	112	720221943	4.039	109	4.62775	247	85.9845	-8.04579	14	-400	647	49.392
99	M	Y	53	N	N	T4	M1	IV		2.5			21.04	1.16	Adenocarcinoma	+	+	+		-	0.1		0.65002	0.368317	17.7285	48.1338	47.7343	48.0853	45.181	56.2687	11132.7	31.2879	0.203712	11835.9	1.06317	11403	-479	96	2343305702	4.91387	367	1.8426	247	184.188	-169.956	-143	-550	797	147.058
100	M	Y	61	Y	N	T4	M1	IV		135.3			11.77	0.28	Adenocarcinoma	+	-			-	0.7		0.813755	0.508815	41.0919	80.7599	89.4087	97.6927	104.682	111.627	132620	65.7188	0.249991	50307.4	0.379336	132857	-159	123	8825142747	4.20881	127	7.02863	247	99.1452	-16.4516	9	-600	847	54.5053
101	M	Y	76	Y	N	T4	M1	IV	1.8	56			98.06	0.2	Adenocarcinoma	+	+	+		-	0.2		0.664828	0.495138	27.5296	55.5999	58.4172	52.6142	74.4113	77.6613	34029.2	36.9643	0.398403	12746.6	0.37458	34057.3	-152	116	1365382204	3.79308	76	7.90891	238	88.036	11.969	48	-550	788	38.2834
102	M	Y	69	Y	N	T2	M1	IV							Adenocarcinoma	+	+	+		-	0.2		0.622968	0.486084	24.348	50.0902	73.8997	53.3435	50.8649	74.0978	22913.3	31.2046	0.413265	9440.2	0.411996	23181.7	-97	107	512535813	3.79739	94	5.48718	342	68.0215	7.75497	19	-351	693	40.1682
103	M	Y	59	Y	N	T4	M1	IV		4.9			22.95	0.29	Adenocarcinoma	+	+	+		-	0.2		0.732572	0.576042	30.1493	52.3387	67.4327	63.091	65.2949	85.8704	35776.6	38.3419	0.325092	16151.4	0.451452	35956.3	-385	109	4674930492	4.23594	118	5.27477	236	137.256	-42.7881	21	-670	906	68.8038
104	F	Y	43	N	N	T4	M1	IV							Adenocarcinoma	+	+	+		-	0.1		0.802702	0.634012	10.6204	16.7511	21.526	18.5489	19.7969	22.6171	1163.49	13.4461	0.304971	1754.15	1.50767	1207.59	-523	-58	501080530	4.47494	245	3.09674	240	143.963	-337.292	-387	-550	790	102.798
105	M	Y	64	Y	N	T3	M1	IV		40			15.36		Adenocarcinoma	+	+	+		-	0.3		0.685961	0.511017	24.6318	48.2015	47.1032	58.9468	46.665	61.1452	24724.6	33.0644	0.453353	9053.17	0.36616	24750.1	-154	157	1098577754	4.11797	108	6.18302	287	95.8199	28.1318	58	-500	787	49.292
106	M	Y	74	Y	N	T4	M1	IV							Adenocarcinoma	+	+	+		-	0.1		0.792219	0.784587	8.25431	10.5206	15.0288	14.1376	18.0773	21.4408	362.075	8.33461	0.560552	438.262	1.21042	378.6	-375.7	63.7	45658722	4.52863	271	2.02997	238	138.389	-124.148	-88.5	-431	669	107.077
107	M	Y	39	Y	N	T4	M1	IV		47.6	7183				Adenocarcinoma	+	+	+		-	0.3		0.755777	0.486092	28.4878	58.6058	50.4643	79.6906	79.1037	87.1764	37073.6	44.2929	0.228284	23553.3	0.635312	37269.7	-264	114	3829754723	4.1347	112	5.64439	247	107.574	-20.1921	21	-550	797	54.7483
108	M	Y	83	N	N	T4	M1	IV		2			16.31	2.62	Adenocarcinoma	+	+	+		-	0.4		0.853581	0.778608	9.91802	12.7381	15.1331	17.0463	14.8577	18.2659	839.982	10.873	0.541922	794.439	0.945781	851.889	-75.8	78	7854569	3.2195	79.5	2.5788	122	46.7629	3.26803	5	-142	264	33.2551
109	M	Y	69	Y	N	T4	M1	IV		4.4	14.39		7.64	0.38	Adenocarcinoma	+	+	+		-	0.2		0.67449	0.598658	36.6124	61.1575	66.0463	73.455	61.0485	87.6111	51566	41.2501	0.284749	23528.7	0.456283	52254.6	-233	114	3349800584	4.33601	138	5.13084	347	107.267	-32.2256	-2	-550	897	60.8791
110	M	Y	70	N	N	T4	M1	IV			8.97	14.18	14.62	0.55	Adenocarcinoma	+	+	+		-	0.2		0.670505	0.588565	35.65	60.5711	79.6063	59.5605	74.0711	81.0549	52164.7	40.6132	0.271453	24871.8	0.476794	52137.3	-288	137	3582537713	4.45692	161	4.40721	233	122.399	-29.7712	8	-554	787	73.1389
111	F	Y	75	N	N	T4	M1	IV		641	1554		23.86	0.15	Adenocarcinoma	+	+	+		-	0.2		0.509482	0.470321	22.7207	48.3089	37.3428	54.8101	48.3375	58.611	13430.9	24.6125	0.320164	8534.56	0.635443	13705.6	-431	124	1766510645	4.7727	239	2.86049	323	159.251	-85.6543	-32	-575	898	108.975
112	F	Y	56	N	N	T4	M1	IV		3.3	22.26		97.54	0.26	Adenocarcinoma	+	+	+		-	0.5		0.893005	0.73064	9.46156	12.9497	18.7452	15.0153	19.3789	20.1612	569.291	11.5641	0.373034	890.482	1.5642	592.93	-424	99.2	116117159	4.80892	311	1.98687	247	163.013	-143.216	-118	-500	747	126.465
113	F	Y	70	N	N	T4	M1	IV		423.7			13.41	0.34	Adenocarcinoma	+	-	-		+	0.2		0.716311	0.514743	25.9801	50.472	51.7478	79.7344	83.0164	83.0164	18340.1	36.1537	0.226199	14868.3	0.8107	18681	-407	108	1985155383	4.58337	203	3.11106	238	146.575	-76.7538	-20	-553	791	97.2832
114	M	Y	80	Y	N	T2	M1	IV					12.65		Adenocarcinoma	+	+	+		-	0.6		0.744095	0.302723	14.0091	46.2771	42.6699	45.4478	63.9129	72.3158	10206.8	34.4346	0.229217	9927.3	0.972612	10131.4	-463	117	2402518731	4.8183	306	2.45306	247	178.696	-105.712	-33	-600	847	131.377
115	F	Y	35	N	N	T3	M1	IV		85.7	51	7.94	7.65	0.2	Adenocarcinoma	+	+	+		-	0.5		0.66777	0.410888	11.722	28.5285	35.3026	27.3911	35.5684	38.5728	3554.28	19.0505	0.359406	3133.76	0.881688	3688.28	-131	98	56902263	3.78337	120	2.57568	167	70.0567	-10.1885	-3	-226	393	49.9555
116	M	Y	57	N	N	T4	M1	IV		10.6	249.1	20.83	52.17		Adenocarcinoma	+	+	+		-	0.1		0.860893	0.483874	9.13048	18.8696	20.6051	25.2278	22.9692	26.1376	1530.41	16.2447	0.424652	1512.36	0.988208	1557.51	-430.8	254	236706354	5.2075	421	2.00755	549	217.595	-82.4446	-84	-500	1049	170.584
117	F	Y	53	N	N	T4	M1	IV		0.9	6.85		10.2	0.24	Adenocarcinoma	+	+	+		-	0.3		0.539232	0.449831	34.7422	77.2337	69.2173	111.751	108.472	116.01	57294.8	41.6469	0.252616	28451.2	0.496576	57654.8	-292	109	4737233624	4.15222	111	5.25321	342	111.565	-24.4049	21	-551	893	57.5801
118	M	Y	78	Y	N	T4	M1	IV	2.7	3	2	8.44	44.88		Small cell lung cancer	+	+	+		-	0.2		0.72774	0.444251	19.2824	43.4043	40.6761	49.2175	53.7546	61.2198	15992.9	31.5871	0.48656	6309.08	0.394492	16029.8	-199	146	769020030	4.23845	117	6.18012	360	105.753	7.12628	42	-571	931	54.2917
119	M	Y	76	Y	N	T4	M1	IV							Adenocarcinoma	+	+	+		-	0.4		0.810732	0.59027	23.8003	40.3211	46.3375	59.9469	65.0915	65.9259	15333.5	32.6896	0.219983	13568.2	0.884872	15559.2	-368	109	1782587020	4.54827	204	2.90363	246	137.533	-70.7888	-23	-500	746	93.6462
120	F	Y	73	N	N	T2	M1	IV		73	16.22		18.11	0.11	Adenocarcinoma	+	+	+		-	0.4		0.6552	0.48743	20.7512	42.5726	40.9085	53.1699	54.7468	55.9608	15401.1	27.8936	0.38334	7809.09	0.507048	15579.3	-348	103	1393550566	4.4562	189	3.15002	247	131.481	-62.4665	-12	-500	747	87.4729
121	M	Y	60	Y	N	T3	M1	IV							Adenocarcinoma	+	+	+		-	0.2		0.817781	0.564965	31.7437	56.187	68.4013	69.6775	70.5929	75.9652	53121.2	45.9486	0.313781	21778.9	0.409985	53442.8	-290	113	4325871708	4.29644	130	5.34674	247	116.58	-34.0326	9	-600	847	62.7389
122	F	Y	80	N	N	T3	M1	IV		31.9	23.83		10.31	0.83	Adenocarcinoma	+	+	+		-	0.1		0.790409	0.578688	17.3322	29.9508	25.9218	41.5181	40.2015	44.8958	4410.26	23.6734	0.300838	4323.09	0.980234	4445.21	-423	90	961076272	4.76927	316	1.90394	207	161.977	-146.797	-124	-500	707	127.672
123	F	Y	48	N	N	T2	M1	IV		129.5			12.73		Adenocarcinoma	+	+	+		-	0.2		0.820054	0.597663	14.1358	23.6518	27.6639	28.0299	25.6265	29.2196	4137.06	19.3958	0.428823	2906.26	0.702493	4200.29	-345.1	131	397772165	4.61586	208	2.96939	247	135.697	-58.0341	-21	-500	747	91.6022
124	F	Y	75	N	N	T4	M1	IV		81.1			20.01	0.35	Adenocarcinoma	+	+	+		-	0.7		0.77108	0.728388	36.9664	50.751	70.3588	53.7254	70.1442	74.7746	47651.6	39.1331	0.38746	16405	0.344269	47801.8	-107	109	2153423473	3.87269	97	7.75651	246	77.4033	0.974936	21	-500	746	41.8458
125	M	Y	53	N	N	T4	M1	IV					7.83	0.31	Adenocarcinoma	+	+	+		-	0.1		0.835832	0.487662	13.5421	27.7694	36.4966	31.0812	29.6521	39.261	3556.09	23.2105	0.268772	4191.94	1.1788	3509	-501	45	1335937792	4.76186	379	1.64273	124	180.595	-223.672	-229	-557	681	149.862
126	F	Y	73	N	N	T2	M1	IV		138.9	1180	10.82			Adenocarcinoma	+	+	+		-	0.5		0.817781	0.564965	31.7437	56.187	68.4013	69.6775	70.5929	75.9652	53121.2	45.9486	0.313781	21778.9	0.409985	53442.8	-290	113	4325871708	4.29644	130	5.34674	247	116.58	-34.0326	9	-600	847	62.7389
127	F	Y	42	N	N	T4	M1	IV		11.2		2	24.62		Adenocarcinoma	+	+	+		-	0.3		0.481562	0.445862	51.246	114.937	107.253	136.285	94.0039	139.821	138728	55.3494	0.212451	61000.8	0.439714	139441	-133	134	4633681887	4.15058	130	3.90226	527	84.3912	4.39596	11	-340	867	55.098
128	F	Y	54	N	N	T4	M1	IV	3.2	13.1	17.76	18.99	8.85		Adenocarcinoma	+	+	+		-	0.2		0.951211	0.808953	9.14537	11.3052	15.121	15.121	16.8257	17.0139	659.074	10.7536	0.513639	713.043	1.08189	682.396	-815	-528	700406176	4.09359	155	7.45052	16	93.7096	-673.504	-685	-850	866	62.9449
129	F	Y	74	N	N	T4	M1	IV							Adenocarcinoma	+	+	+		-	0.2		0.748011	0.678028	22.6738	33.4407	32.9425	44.1809	45.6503	48.5639	12295.9	25.014	0.469531	5486.89	0.446238	12371.7	-299	92	952845229	4.27323	137	4.09509	247	111.101	-49.593	-10	-500	747	66.3588
130	F	Y	59	N	N	T4	M1	IV	2.5	40.2	97.53	9.56			Adenocarcinoma	+	+	+		-	0.4		0.925991	0.736023	18.581	25.2452	33.2612	34.6466	38.0601	41.8882	5935.79	23.3768	0.26403	6004.6	1.01159	5668.98	-149	70	138257838	3.60638	104	4.18197	97	68.2193	-25.6582	-7	-320	417	44.5355
131	M	Y	75	Y	N	T4	M1	IV		4.3			10.52	0.5	Adenocarcinoma	+	+	+		-	0.6		0.855859	0.663777	26.3947	39.7645	60.9145	46.1674	60.7455	65.2283	22077.9	34.0328	0.431346	8823.28	0.399643	22240.4	-110	93	656327226	3.70775	88	5.35394	408	65.824	0.0727966	15	-336	744	37.8911
132	M	Y	82	Y	N	T4	M1	IV		163.9	76.55		13.85	1.35	Adenocarcinoma	+	+	+		-	0.7		0.694347	0.658684	14.1378	21.4637	25.3051	29.7436	32.5331	32.5331	1182.37	14.9033	0.203877	2652.27	2.24318	1226.33	-103	110	21318648	3.57468	125	2.04917	168	65.939	0.38252	-2.5	-130	298	50.8903
133	M	Y	77	Y	N	T4	M1	IV		43.4	57.77		14.3	0.38	Adenocarcinoma	+	+	+		-	0.5		0.684416	0.532591	15.1901	28.5211	35.569	34.3913	28.4383	37.7652	3238.1	19.5203	0.235395	4496.55	1.38864	3253.59	-65	137	80175225	3.51591	111	2.27724	207	61.1918	31.5352	26	-99	306	45.6278
134	M	Y	74	N	N	T4	M1	IV		2.9		18.79	5.22	0.6	Adenocarcinoma	+	+	+		-	0.2		0.76116	0.621001	16.3529	26.3332	31.6292	28.6854	28.6674	36.1921	4704.12	20.0438	0.416897	3256.68	0.692303	4711.21	-50	111	69362142	3.31726	86	2.67061	206	49.5885	30.4641	28	-90	296	35.5311
135	M	Y	72	Y	Y	T4	M1	IV	3	1000		2		0.27	Adenocarcinoma	+	+	+		-	0.2		0.983496	0.72303	25.7444	35.6063	46.981	45.7186	49.1361	51.7065	15637.8	35.0186	0.136045	22229	1.42149	15036.3	-72	136.3	234119316	3.51884	119	2.17631	204	63.9591	26.9087	20	-99	303	48.6425
136	M	Y	75	Y	Y	T3	M1	IV		2.9	579		24.3	0.28	Adenocarcinoma	+	+	+		-	0.1		0.928519	0.298654	13.9721	46.7835	59.1374	51.1561	60.2904	73.7045	10885.3	43.4394	0.233548	10170.3	0.934318	10618	-72	88	104375812	3.2417	87	2.77931	204	49.4044	5.29411	0	-99	303	35.9223
137	F	Y	55	N	N	T4	M2	IV							Adenocarcinoma	+	+	+		+	0.3		0.827986	0.827986	0.827986	0.827986	0.827986	0.827986	0.827986	0.827986	0.827986	0.827986	0.827986	0.827986	0.827986	0.827986	0.827986	0.827986	0.827986	0.827986	0.827986	0.827986	0.827986	0.827986	0.827986	0.827986	0.827986	0.827986	0.827986
138	F	Y	72	N	N	T2	M1	IV					9.62	0.34	Adenocarcinoma	+	+	+		-	0.6		0.56445	0.475279	30.0442	63.2139	56.8147	78.9557	67.9253	94.4894	39637.2	35.6811	0.302433	18589	0.468979	40021.3	-105	131	1153515029	3.9675	116	3.72552	340	74.6961	16.3347	23	-300	640	49.0726
139	F	Y	83	N	N	T4	M1	IV			13.08		7.93	0.2	Adenocarcinoma	-	-	-	-	+	0.5		0.57478	0.509171	28.9556	56.8681	53.3736	84.5607	81.028	90.4359	19962.8	32.6866	0.147334	24154.4	1.20997	20608	-47	107	250517891	3.17033	85	2.17521	139	46.8488	31.6737	34	-89	228	35.0736
140	M	Y	69	Y	N	T4	M1	IV		2.4	59.11		8.11	0.39	Adenocarcinoma	+	+	+		-	0.7		0.855318	0.729472	59.7983	81.9747	100.619	97.886	99.1356	102.297	235324	70.1144	0.335702	54908.7	0.233332	234804	-65	114	6714523161	3.67602	85	12.8861	193	71.3564	16.3661	37	-624	817	35.8239
141	F	Y	79	N	N	T4	M1	IV							Squamous cell carcinoma	+	+	+		-	0.3		0.634363	0.476531	34.952	73.3466	69.6299	98.9688	74.0506	101.961	71342.3	46.5284	0.200611	41466.3	0.58123	68917.2	-77	111	1134298753	3.49934	101	2.42966	157	57.3143	18.6929	22	-158	315	41.8726
142	F	Y	74	N	N	T4	M1	IV		22			20.51	0.21	Adenocarcinoma	+	+	+		-	0.1		0.602857	0.531545	12.6921	23.8777	24.2578	22.3958	27.3438	30.8674	1615.38	14.3949	0.309319	2152.42	1.33246	1637.89	-98	127	27214124	3.54533	112	2.65812	153	66.3989	33.8596	52	-171	324	48.0254
143	M	Y	50	N	Y	T4	M1	IV		75.8	48.77		20.95	0.32	Adenocarcinoma	+	+	+		-	0.1		0.783501	0.41757	13.3407	31.9485	46.7525	36.8989	46.424	48.2738	4139.41	25.0316	0.316083	3944.34	0.952876	4208.04	-413	206	520515560	4.9642	406	1.76362	319	202.194	-70.8131	-32	-491	810	164.599
144	F	N	47	N	N	T2	M1	IB		0.5			4.94		Adenocarcinoma	+	+	+	-	-	0.1		0.823134	0.566322	17.1458	30.2757	54.3323	38.4708	63.3482	66.9477	4925.21	24.921	0.36414	3844.43	0.780562	5133	-124	94	54708848	3.83538	92	8.09276	311	70.4986	-8.14105	7	-665	976	40.1745
145	M	N	48	N	N	T2	M1	IB		12			4.2	1.28	Adenocarcinoma	+	+	+	-		0.1		0.497865	0.19574	9.26039	47.3096	43.1045	37.3631	40.2616	52.9906	3506.08	23.5538	0.327508	3407.82	0.971974	3616	-143.5	81	38709837	3.89703	102	7.24043	362	72.0584	-25.716	-12	-730	1092	44.3131
146	F	N	71	N	N	T1	M0	IA	1.1	5.9	11.28	39.28	4.88	0.19	Adenocarcinoma	+	+	+			0.1		0.650303	0.453246	23.1939	51.1729	55.5788	65.0308	75.452	77.2593	16899	33.2778	0.306039	10405.9	0.615772	16344	-70	108	98330525	3.57477	93	5.78709	307	57.2045	20.1719	25	-528	835	38.9018
147	M	N	70	N	N	T1	M0	IA		6.3			7.08	0.48	Adenocarcinoma	+	+	-			0.5		0.797522	0.606643	23.6807	39.0356	48.3839	53.2353	52.2015	62.8331	14521.4	31.1317	0.28976	9933.84	0.684084	14759	-43	132	141511940	3.57167	81.5	9.43372	492	58.6591	48.0499	61	-573	1065	34.7119
148	F	N	72	N	N	T1	M1	IA							Adenocarcinoma	+	+	+			0.6	0.047	0.774509	0.739712	32.7045	44.2125	54.3323	52.0096	56.921	65.4294	28650.1	34.243	0.244184	18543.2	0.647228	27389	-85	101	168827517	3.63321	97	6.67632	332	59.2583	8.77736	13	-675	1007	40.1594
149	M	N	46	Y	N	T2	M0	IB		2.3	27.9	24.94	8.78		Adenocarcinoma								0.653604	0.614013	19.9028	32.4143	37.1214	36.1248	40.6079	41.3401	8029.58	21.1861	0.395369	4904.68	0.610826	8293	-101	99	75365438	3.79926	96	7.51947	365	67.0382	1.24273	12	-624	989	40.4104
150	F	N	48	N	N	T2	M0	IB							Adenocarcinoma	+	+	+			0.8		0.766486	0.549687	25.0729	45.613	58.0775	50.2195	59.0339	64.1093	22024.5	34.9618	0.326843	11625.6	0.527849	22152	-81	106	169557310	3.70959	93	8.57509	328	61.9014	10.7265	16	-773	1101	39.0005
151	F	N	64	N	N	T1	M0	IA							Adenocarcinoma								0.693664	0.518764	21.774	41.9728	61.8142	42.0119	59.8415	64.1561	13000.2	29.115	0.301701	8862.18	0.681698	13176	-531	125	1178746696	5.07085	448.25	1.91485	310	223.667	-157.619	-109	-879	1189	182.354
152	F	N	65	N	N	T2	M0	IB		3.6			4.79		Adenocarcinoma	+	-	-			0.2		0.777525	0.612808	8.40418	13.7142	16.2788	15.0333	17.4929	19.4679	667.542	10.6631	0.507877	727.297	1.08951	689	-150.2	102	7709369	4.0459	135	3.99748	261	80.9308	-16.1205	-6	-487	748	54.1796
153	M	N	58	Y	Y	T1	M0	IA		21			2.73	0.13	Adenocarcinoma	+	+	+		-	0.4		0.851806	0.839841	8.54008	10.1687	10.7703	13.4164	11.4018	13.7477	454.25	8.66175	0.660786	432.467	0.952047	466	-161.5	94	6563491	4.07849	134.5	4.79599	248	84.9171	-30.2725	-13.5	-517	765	53.1061
154	F	N	54	N	N	T2	M0	IIA		4.7			9.97		Adenocarcinoma								0.512728	0.347478	22.5149	64.7952	73.5527	58.6003	46.3249	73.5799	23068.4	33.2223	0.24439	16035.4	0.695123	22637	-518	60	1842774236	4.97565	347	2.22776	428	184.602	-185.158	-133	-911	1339	141.93
155	F	N	68	N	N	T1	M1	IA		5.7			5.74	0.33	Adenocarcinoma	+	-	-	-		0.4		0.682482	0.533653	45.2371	84.7688	85.4225	121.458	122.004	136.653	66190.9	57.8532	0.108555	72895.1	1.10129	67130	-620	81	8114615935	5.14905	481	1.94636	433	242.83	-213.315	-126	-1076	1509	197.804
156	F	N	68	N	N	T2	M1	IV		1.2			3.01		Adenocarcinoma								0.416199	0.128537	8.09019	62.9405	59.1354	34.176	60.3738	63.8201	2443.67	26.1957	0.214144	4097.06	1.6766	2640	-679	-177.8	642951047	4.91918	263	2.69539	217	155.584	-454.97	-480	-919	1136	111.632
157	M	N	54	N	N	T2	M0	IIA		1.5					Adenocarcinoma								0.563204	0.513778	27.7886	54.0869	42.5441	55.7853	57.8014	61.9193	28242.8	30.462	0.467792	9587.43	0.339465	28204	-92	88	165671471	3.60455	88	5.75707	332	57.0151	-0.417707	4	-678	1010	37.0894
158	M	N	71	Y	N	T2	M0	IB							Adenocarcinoma								0.837698	0.572633	17.8237	31.1259	39.0128	57.8705	43.4166	58.6003	6314.79	26.0741	0.337506	4895.26	0.775205	6534	-117	86	59593455	3.81343	100	7.14772	283	67.5396	-16.1621	-8	-599	882	42.1362
159	F	N	55	N	N	T1	M0	IA		1			3.82		Adenocarcinoma	+	+	+		-	0.2		0.851647	0.64342	21.2074	32.9604	38.1182	39.2173	48.2597	49.1019	12381.7	28.0707	0.452434	5720.7	0.462028	12589	-318	87	391122867	4.31318	140	5.56395	274	121.409	-58.1904	-6	-919	1193	69.5906
160	F	N	78	N	N	T1	M0	IA		29.9			7.35	0.23	Adenocarcinoma	+	+	+		-	0.2		0.758672	0.501002	45.0677	89.9551	85.3756	108.6	107.898	111.964	155194	68.2464	0.383451	36421.4	0.234683	156745	-36	87	645054109	3.13071	62	14.1867	1026	41.4446	24.2486	28	-725	1751	26.2256
161	F	N	53	N	N	T1	M0	IA							Adenocarcinoma								0.627792	0.540901	54.3086	100.404	119.403	125.782	82.5651	133.158	211396	63.0328	0.206059	83283.4	0.393968	209969	-57	87	868984835	3.28936	73	7.85714	784	46.2507	15.3924	19	-710	1494	30.5211
162	M	N	56	Y	N	T2	M0	IB							Adenocarcinoma	+	+	+			0.1		0.933909	0.370066	13.6391	36.856	50.2195	58.8727	51	59.5399	5455.75	34.4201	0.235387	6367.04	1.16703	5804	-415	149	353910644	5.00855	372	1.9424	335	186.571	-121.992	-107.5	-750	1085	148.684
163	F	N	72	N	N	T1	M1	IA	0.9	16.5	2.749	36.88			Adenocarcinoma	+	-	-			0.1		0.454476	0.355859	30.0573	84.464	93.4773	62.2415	84.4808	103.701	33063.2	38.3868	0.180357	27621.5	0.835414	33311	-395	56	1701758959	4.74455	260	2.49825	746	142.711	-147.314	-121	-774	1520	106.434
164	F	N	40	N	N	T1	M0	IA	1.6	2	13.97	25.28	9.6		Adenocarcinoma							0.07	0.768318	0.490971	9.11363	18.5625	26.0192	17.2047	26.0768	26.7021	493.333	14.2619	0.284975	1059.51	2.14765	562	-315.7	63.8	19401521	4.53554	201.5	3.54889	252	120.683	-108.233	-88	-719	971	84.4032
165	M	N	66	N	N	T2	M0	IB		2.4				2.61	Adenocarcinoma	+	+	+	-	-	0.1		0.647813	0.471275	7.30809	15.5071	14.8661	15.2643	14.5602	16.8819	387.542	10.0457	0.383139	670.925	1.73123	424	-668	-170.6	109492142	4.75795	247	3.33313	147	153.102	-469.91	-516	-889	1036	104.228
166	M	N	75	Y	N	T1	M0	IA							Squamous cell carcinoma	+	+	+	-		0.1		0.354341	0.241319	24.3952	101.091	54.231	112.641	106.471	120.175	36481	35.8208	0.185334	28701.7	0.786756	38143	-102	98	353191414	3.76283	91.5	8.69216	482	66.5425	2.90292	17	-809	1291	39.1482
167	F	N	71	N	N	T1	M1	IA		1.9					Adenocarcinoma	+	+	+		-			0.717847	0.457188	43.5242	95.1998	100.623	112.614	91.0659	112.614	124329	68.3389	0.113516	106123	0.853563	116749	-99	116	954594332	3.84793	113	5.45352	540	68.6989	10.1087	15	-710	1250	46.7879
168	M	N	58	N	N	T2	M0	IB							Adenocarcinoma								0.318069	0.17112	10.4999	61.3599	38.8973	56.2228	45.5412	65.284	2844.83	19.5167	0.309305	3139.08	1.10343	2946	-191	108.5	55780687	4.25257	127	6.66989	312	94.8611	-28.9128	-6	-769	1081	54.8334
169	M	N	84	Y	Y	T2	M0	IB		4.1				0.51	Adenocarcinoma	+	+	+	-		0.6		0.716596	0.38548	9.58568	24.8669	32.2025	24.5967	25.4951	32.218	2186.88	17.8195	0.473984	1718.98	0.786043	2196	-93	97	17117175	3.72354	99	7.82538	297	63.7656	-1.50137	4	-577	874	41.081
170	M	N	66	Y	N	T2	M0	IB		2.7			7.43		Adenocarcinoma								0.911283	0.478899	5.33716	11.1447	14.1421	13	16.1555	17.1172	198.25	10.1559	0.460533	357.026	1.80089	225	-405.2	-71.2	18004208	4.32765	171	2.78279	113	101.57	-252.853	-261	-539	652	70.3709
171	M	N	82	Y	Y	T2	M0	IIA	2.9	3.6	34.63	33.67	8.52	0.49	Adenocarcinoma	+	+	+	-	-	0.4		0.885632	0.757948	18.7876	24.7875	34.1321	32.249	29.8329	39.2428	5286.42	21.9526	0.334776	4383.67	0.829233	5357	-135	96	56510428	3.96025	119	7.10271	276	75.3486	-18.5096	-8	-841	1117	49.5324
172	M	N	71	N	N	T2	M0	IB		2.4	462.7	1487	717.2		Adenocarcinoma	+	+	-		-	0.1		0.739941	0.476734	20.0453	42.0471	60.5392	64.2573	63.5059	81.8902	10499.7	31.1124	0.319381	7260.36	0.691485	11078	-107	108	110142369	3.87491	102	7.03426	305	70.914	4.41587	16	-654	959	43.2095
173	F	N	74	N	N	T1	M1	IA		4.9			2.51	0.5	Adenocarcinoma							0.56	0.504321	0.353106	17.2096	48.7378	41.2311	62.2896	57.7062	70.2353	7964	24.5795	0.248214	7769.83	0.975619	7705	-296	57	206787990	4.19002	132	5.45924	270	108.345	-72.5833	-27	-829	1099	64.183
174	F	N	56	N	N	T2	M0	IB					5.94		Adenocarcinoma								0.885698	0.593283	7.45944	12.5732	14.5602	14.4222	14.5602	16.4924	647.667	11.136	0.668178	541.784	0.836516	659	-221.4	50	11271297	3.97901	133.5	4.679	149	86.3613	-65.7527	-37	-581	730	55.9451
175	M	N	72	N	Y	T2	M0	IB							Adenocarcinoma								0.782634	0.487998	14.5011	29.7155	38.6005	40.05	45.7056	54.8999	1829.42	23.2564	0.280604	2577.89	1.40913	1957	-162.4	96.4	26338250	4.08995	126	5.63041	283	83.5003	-27.0199	-14	-679	962	52.7879
176	F	N	66	N	N	T1	M0	IA							Adenocarcinoma								0.826209	0.531435	23.2414	43.7332	55.0091	58.4209	65.6049	66.2269	20864.3	36.1328	0.392679	9333.61	0.447347	21116	-83	92.5	152373378	3.6039	81	9.09645	468	58.4301	7.01449	17	-745	1213	34.5561
177	M	N	73	N	N	T3	M0	IB	1.5	0.5	9.15	11.57			Adenocarcinoma	+	+	+		-	0.3		0.665684	0.412569	14.4609	35.0509	35.0571	45.8803	44.5982	50.9411	5423.29	23.3328	0.298312	5004.06	0.922698	5502	-122	98	54105227	3.87411	107	7.19839	347	71.6242	-7.9373	4	-673	1020	45.1266
178	F	N	71	N	N	T1	M1	IA		0.9					Adenocarcinoma	+	+	+			0.1		0.718538	0.493849	22.5527	45.6671	45.8039	67.082	59.5399	67.3498	21171.2	32.8136	0.439857	8414.02	0.397427	21236	-298	103	592397788	4.27139	126	5.56044	323	117.598	-37.6312	12	-884	1207	65.4732
179	F	N	73	N	N	T1	M0	IA		0.8	8.04	4.96	10.54		Adenocarcinoma								0.718538	0.493849	22.5527	45.6671	45.8039	67.082	59.5399	67.3498	21171.2	32.8136	0.439857	8414.02	0.397427	21236	-298	103	592397788	4.27139	126	5.56044	323	117.598	-37.6312	12	-884	1207	65.4732
180	F	N	48	N	N	T2	M1	IV							Adenocarcinoma	+	+			-	0.1	0.19	0.936983	0.865432	62.8686	72.6442	101.257	131.244	127.566	132.144	161710	68.0664	0.168838	85017.3	0.525737	152192	-103	127	1448459957	3.93892	119	5.60469	618	73.4491	13.3712	20	-779	1397	49.3311
181	M	N	78	Y	N	T3	M0	IB		3.7			15.79	0.88	Adenocarcinoma							0.05	0.864927	0.693449	6.3504	9.15771	10.8167	9.84886	10.8167	11.5326	257.667	7.92075	0.632417	309.637	1.2017	267	-616.2	-195	49543642	4.6133	229	3.06218	147	131.609	-398.165	-402	-776	923	92.2132
182	M	N	45	Y	N	T3	M0	IB							Adenocarcinoma								0.756243	0.677761	20.0841	29.633	44.5982	30.8707	40.8167	52.2303	6548.46	22.4097	0.307219	5509.71	0.841375	6721	-620	27	1071610176	5.14878	430	1.85574	298	211.019	-317.013	-345	-923	1221	169.812
183	F	N	49	N	N	T1	M0	IA					7.83	0.19	Adenocarcinoma	+	+	+		-	0.3	0.24	0.881089	0.654084	7.6315	11.6675	13.1529	14.8661	14	15.5885	500.917	10.2801	0.520728	585.756	1.16937	527	-737	-456.6	204513563	4.13913	142	6.14702	90	93.1365	-610.472	-633	-860	950	60.762
184	F	N	55	N	N	T2	M1	IB		1.8	74	47.47		0.2	Adenocarcinoma								0.925201	0.789715	4.66226	5.90372	6.32456	7	7.07107	7.28011	87.0833	5.46212	0.739	128.567	1.47637	92	-635.5	-227.7	18762552	4.39057	218.75	2.62562	-41	124.372	-424.478	-446	-785	744	85.0417
185	F	N	45	N	N	T1	M0	IA		1			4.69		Adenocarcinoma							1.769	0.586262	0.579227	13.955	24.0924	21.0238	30.2655	32.5576	34.1906	2448.79	14.1245	0.403723	2176.22	0.888689	2509	-619	-30	435917647	5.06825	333	2.27252	245	182.903	-354.999	-390	-876	1121	138.264
186	M	N	72	Y	N	T2	M0	IB		2.9			13.49		Squamous cell carcinoma								0.842269	0.596396	5.47309	9.17694	11.0454	9.84886	12.1655	12.2066	165.792	7.72945	0.539054	270.745	1.63304	182	-642	-143.9	40859924	4.73346	257.5	3.05792	198	163.552	-429.626	-477	-771	969	115.839
187	M	N	77	N	N	T4	M1	IV			3.7				Adenocarcinoma								0.818397	0.697498	23.3998	33.5482	45.2217	41.7732	41.1947	52.4023	12169.5	27.4557	0.44964	5690.31	0.467586	12251	-212	83	225139173	3.98818	98	7.09547	273	91.3532	-29.4057	5	-799	1072	47.8656
188	M	N	70	N	N	T1	M0	IA							Adenocarcinoma								0.797728	0.746124	27.713	37.1426	46.2385	49.0306	54.626	55.5518	19088.4	29.6297	0.515132	6705.21	0.351271	19160	-11	124	156513390	3.29572	63	11.0233	320	48.1561	52.6102	61	-675	995	26.6794
189	F	N	55	N	N	T2	M1	IB							Adenocarcinoma							0.05	0.825611	0.133467	6.2625	46.9216	46.8722	42.4264	52.0096	52.0096	2001.04	38.739	0.274493	2797.63	1.39809	2000	-522.2	-8.9	227871621	4.96345	297	2.40156	266	161.258	-275.882	-291	-885	1151	119.534
190	M	N	52	Y	Y	T3	M0	IB		1.2			3.78	0.25	Adenocarcinoma								0.6576	0.627935	10.9628	17.4585	16.1555	18.7883	20	21.1187	1185.21	11.4807	0.399879	1354.42	1.14277	1185	-139	106	14095211	4.04756	123	5.58118	263	79.837	-15.6987	-7	-638	901	51.5619
191	M	N	46	N	N	T1	M0	IA							Adenocarcinoma								0.527826	0.50102	19.6002	39.1206	40.7063	27.5862	41.2311	45.3211	10251.6	20.6489	0.550624	4144.66	0.404295	10366	-13	181	166668773	3.74459	81	8.96241	369	65.1396	79.1087	88	-719	1088	35.2797
192	F	N	51	N	N	T1	M0	IA		2			10.88		Adenocarcinoma							0.1	0.688427	0.542232	15.2149	28.0597	29	27.6586	24.4131	31.0644	2010.08	19.317	0.205194	3753.72	1.86745	2245	-665	-124.4	520070663	4.97327	282	2.90798	230	168.249	-434.178	-475	-873	1103	119.019
193	M	N	68	Y	Y	T2	M0	IB															0.812147	0.678407	10.6604	15.7139	17.72	17.4929	15.6525	19.105	1338.29	12.762	0.659477	890.536	0.665427	1358	-105.9	126.3	15939618	3.95365	105	7.0028	345	75.4244	9.81296	18	-555	900	44.8223
194	F	N	58	N	N	T1	M0	IA							Adenocarcinoma	+	-			-	0.35		0.605569	0.469441	5.46889	11.6498	9.21954	11.6619	10.8167	14.4568	197	7.05475	0.564978	289.799	1.47106	211	-202	119	4087190	4.22523	143.5	6.03286	205	98.4872	-31.3365	-13	-650	855	61.0236
195	F	N	54	N	N	T4	M1	IV		5			4.5		Adenocarcinoma								0.635217	0.420066	46.2205	110.032	92.6499	124.619	106.832	127.008	79107	69.894	0.14072	63329.5	0.800555	78530	-146.1	118	1021998619	4.13703	130	5.41354	656	84.7917	-8.79586	4	-768	1424	54.6562
196	F	N	40	N	N	T1	M0	IA		1.4			2.07		Adenocarcinoma								0.958787	0.749649	5.05021	6.73676	8.24621	8.06226	9.48683	9.48683	121.792	6.45912	0.713302	166.58	1.36774	131	-624	-91	27718218	4.6165	261.5	2.85635	105	159.378	-416.29	-445	-754	859	114.79
197	M	N	72	Y	N	T3	M0	IB		1.4	125.22	77.7			Adenocarcinoma								0.909529	0.729568	10.8188	14.8291	16.4012	17.0294	16.1555	18.412	425.375	13.4875	0.245896	1112.37	2.61502	523	-774	-521.6	235924568	4.04199	121	12.5384	294	89.6875	-658.409	-690	-904	1198	51.7926
198	F	N	63	N	N	T3	M0	IB		2.4			9.88	0.28	Adenocarcinoma								0.733966	0.564171	6.50931	11.5378	11	13.4536	12.2066	14.7986	247.792	8.46838	0.434178	439.415	1.77332	275	-676	-269	77253089	4.56958	188.5	4.47883	157	133.561	-499.807	-539	-804	961	84.4027
199	F	N	76	N	N	T4	M0	IV							Adenocarcinoma								0.91369	0.710371	15.8982	22.3802	39.8246	28.0179	31.4006	39.8372	3051.62	20.4486	0.317826	3201.22	1.04902	3068	-307.3	84	94667308	4.54708	214.25	2.93503	266	122.861	-89.8657	-60	-659	925	88.2991
200	M	N	69	N	N	T1	M1	IIA					8.21		Adenocarcinoma								0.698383	0.577007	24.5452	42.5388	58.6941	54.0833	42.2019	59.7578	17151.1	29.7084	0.3513	9155.19	0.533797	17220	-115	102	172368250	3.87111	103	7.60218	347	71.1449	-2.26818	10	-760	1107	43.5596
201	F	N	56	N	N	T1	M0	IA		0.6					Adenocarcinoma	-	-	-		+	0.25		0.873872	0.598158	5.57395	9.31853	10.6301	9.48683	11.4018	13.6382	233.792	8.1432	0.688984	266.376	1.13937	246	-234.5	79.5	4797161	4.1611	172.25	3.88661	223	100.813	-54.2967	-20.5	-484	707	66.3958
202	M	N	71	Y	N	T4	M0	IB		30	479.1	16.06	53.19	0.12	Adenocarcinoma								0.879036	0.600873	29.1118	48.4491	63.9766	63.5059	55.9017	68.8186	37800.9	42.5885	0.52795	10317.1	0.272934	38092	-62	95	220828450	3.4613	78	10.9568	332	52.3896	15.2529	20	-663	995	33.1333
203	M	N	49	Y	Y	T1	M1	IIA		2.8		16.88	2.9	0.25	Adenocarcinoma								0.658135	0.461661	13.3716	28.9641	36.8917	30.8869	31.3209	37.4967	3480.12	19.0623	0.358628	3096.72	0.889831	3552	-605	21.9	521058171	5.14997	405	1.90021	252	204.345	-301.716	-319.5	-879	1131	162.235
204	M	N	49	Y	Y	T3	M0	IB		7.3			5.64	0.31	Adenocarcinoma								0.650527	0.58505	8.66805	14.8159	17.088	11.4018	15.5242	17.5784	590.292	9.63816	0.461436	737.48	1.24935	596	-745	-455	235258007	4.10456	147.5	3.53239	-211	92.1268	-617.602	-644.5	-842	631	63.7278
205	F	N	68	N	N	T2	M0	IB		1.8			7.21		Adenocarcinoma								0.709445	0.529169	21.4236	40.4852	36.6197	41.2311	50.2494	50.951	15292.5	28.7221	0.474834	6274.72	0.410314	15441	-486	78	1016755775	4.76625	347	2.23301	395	185.396	-140.136	-62	-784	1179	145.062
206	M	N	47	Y	N	T4	M1	IB		1			2.54		Adenocarcinoma								0.786575	0.529662	9.3182	17.5927	19.2354	19.3132	22.8254	23.3452	1410.29	13.838	0.608153	1000.02	0.70909	1437	-541	50	141833122	5.04719	384	2.15529	272	199.668	-212.511	-169	-939	1211	157.251
207	M	N	74	N	N	T3	M1	IV		3.1			4.1		Squamous cell carcinoma	+	+	+					0.794456	0.557048	17.4673	31.3569	32.1403	39.0512	40.4475	42.1663	4442.88	24.9117	0.257371	5078.09	1.14297	4578	-577	-24	704067225	5.04357	302	2.51331	352	172.15	-331.607	-360	-1037	1389	126.404
208	M	N	63	N	N	T4	M0	IB	1.5	1.3	11.01	10.11			Adenocarcinoma								0.463588	0.325515	6.8192	20.949	21.4709	12.1655	18.4391	21.5639	420.917	9.71168	0.388606	698.938	1.66051	438	-648.6	-211.8	107518490	4.7231	224.25	3.32618	140	142.988	-461.858	-503	-841	981	98.4558
209	F	N	54	N	N	T3	M0	IB							Adenocarcinoma	+	+	+	-	-	0.3		0.638255	0.487096	19.6249	40.2895	50.2494	41	41.5933	52.0961	8555.29	25.715	0.357225	5662.81	0.661907	8781	-85	91	70546746	3.64074	81	9.36746	300	60.121	-0.571917	8	-708	1008	34.3474
210	M	N	67	N	N	T2	M0	IB		0.5					Adenocarcinoma	+	+	+		-	0.4		0.748586	0.679125	20.6841	30.457	36.3593	32.573	35.8469	39.37	8832.54	22.7997	0.441166	4683.88	0.530299	8920	-94	104	65088909	3.72544	97	5.89524	349	63.3186	7.93374	15	-573	922	41.1837
211	M	N	66	Y	N	T3	M0	IB		15.8	94.98	7.05			Adenocarcinoma								0.688479	0.656659	7.25277	11.045	11.4018	10.8167	11.1803	13.4536	366.958	7.60422	0.628124	394.624	1.07539	380	-442	29.1	28461830	4.81688	289.25	2.57708	161	151.917	-203.563	-197	-827	988	113.888
212	F	N	64	N	N	T1	M0	IA		1.2			9.18	0.16	Adenocarcinoma								0.769119	0.53803	11.573	21.51	25.4951	25	30.4631	33.3017	2097.83	16.5438	0.593487	1335.33	0.636526	2160	-141.1	162	37648321	3.97638	117	5.29753	316	91.9696	49.9662	89	-576	892	57.1104
213	M	N	58	N	N	T2	M0	IB		0.9			3.68	0.77	Squamous cell carcinoma								0.676328	0.645106	6.39215	9.90869	11.1803	10.0499	10.2956	11.5758	178.792	6.70153	0.463936	330.819	1.85031	198	-667.6	-425.1	63324591	3.88115	126.25	3.73535	-200	76.6091	-557.015	-572	-758	558	52.2867
214	F	N	66	N	N	T2	M0	IB		2.3			5.6		Adenocarcinoma								0.718692	0.657361	14.8263	22.5542	25.807	29.8329	28.6531	31.7175	2902.29	16.2095	0.432114	2277.09	0.784583	2984	-546	79.7	220989655	4.71114	288	3.2855	350	193.456	-130.865	-30	-1027	1377	131.969
215	M	N	74	N	N	T3	M0	IB		2			17.26		Squamous cell carcinoma								0.640787	0.559394	25.2384	45.1174	42.0119	68.2642	62.514	75.1665	19532.4	28.9107	0.397642	8820.56	0.451586	19803	-164.8	87	279460383	3.83654	92	8.13777	241	79.4772	-15.4004	12	-768	1009	41.7097
216	M	N	78	Y	N	T2	M0	IB		951	3974				Squamous cell carcinoma								0.773952	0.607529	15.4278	25.3944	28.0179	31.6228	31.4006	34.0735	4538.75	19.6541	0.404605	3276.5	0.721895	4610	-612	0	737308457	5.0854	401	1.88479	336	200.2	-326.792	-361	-829	1165	160.265
217	F	N	34	N	N	T3	M0	IB		0.6			7.03	0.41	Adenocarcinoma								0.703691	0.395747	8.08313	20.425	18.0278	21.0238	21.2603	24.2899	734.583	14.3729	0.347181	1134.03	1.54377	758	-162.6	97	9607080	4.01733	122	6.31877	235	82.0129	-20.0449	-1	-617	852	52.4013
218	M	N	69	Y	Y	T2	M0	IB		284.1			22.42	0.41	Adenocarcinoma								0.8686	0.851276	7.37748	8.66638	10.4403	10.4403	11.1803	12.6886	215.625	7.52761	0.4938	352.154	1.63318	234	-678.1	-369.2	69163153	4.29505	165.5	4.41276	67	102.913	-527.406	-539.5	-789	856	70.0631
219	F	N	50	N	N	T2	M0	IIA		0.6					Adenocarcinoma								0.470794	0.450644	8.68709	19.2771	15	21	24.4131	26.4008	637.917	9.07553	0.438556	817.149	1.28097	669	-595.2	31.6	85261905	5.15698	394	2.03904	224	201.688	-267.87	-261	-820	1044	156.128
220	M	N	61	Y	N	T2	M0	IB		407.3			37.6		Adenocarcinoma								0.825252	0.569994	5.16751	9.06591	10.8167	9.84886	12.083	13.0384	154.792	7.48166	0.605572	230.224	1.48731	170	-673.9	-36.8	40979182	4.82387	334.25	2.75006	226	196.952	-427.812	-491	-824	1050	142.454
221	M	N	62	Y	N	T2	M0	IB							Adenocarcinoma								0.729467	0.633557	4.03969	6.37621	6.32456	6.7082	7.81025	7.87401	66.7083	4.65124	0.748223	106.31	1.59365	74	-608.7	-442	20903538	3.27089	106	2.44325	-349	55.7925	-527.324	-524.5	-670	321	42.7205
222	M	N	76	N	N	T2	M0	IB					9.84	1.02	Squamous cell carcinoma								0.884583	0.70907	4.4871	6.32815	7.07107	7.28011	6.40312	7.87401	88.9167	5.59778	0.712995	135.12	1.51962	95	-698.8	-354.6	28658293	4.18266	143	3.83952	-65	101.052	-533.021	-535	-859	794	66.4743
223	M	N	34	N	N	T3	M0	IB		0.6	95.21	25.62			Adenocarcinoma								0.839823	0.616917	14.2793	23.1462	35.5106	29.4109	32.1403	39.5727	3475.83	19.4387	0.4842	2291.74	0.659335	3553	-167	68	39461674	3.84289	98	5.85944	358	73.2703	-30.7824	-9	-581	939	44.1759
224	F	N	70	N	N	T4	M1	IV		246.5	59.89	351.83			Adenocarcinoma								0.709677	0.381092	4.53335	11.8957	10.8167	13.4536	9.21954	16.1245	154.792	8.44209	0.577787	241.295	1.55884	172	-628.8	61.7	23902169	4.98768	474.25	1.7731	264	229.955	-265.657	-244	-812	1076	185.881
225	M	N	69	Y	Y	T1	M0	IA		26.1			4.56		Adenocarcinoma								0.708985	0.496519	5.92657	11.9362	12.53	13.9284	10.0499	15.3623	331.5	8.46261	0.592266	391.102	1.17979	344	-626.4	-151.9	67605450	4.80646	276.25	2.70434	173	154.562	-402.128	-414	-912	1085	113.547
226	F	N	70	N	N	T1	M0	IA		2.2			8.37		Adenocarcinoma								0.598913	0.499923	11.8265	23.6566	26.4008	24.1661	23.6008	29.8998	1546.71	14.1682	0.389617	1660.04	1.07327	1613	-139.8	112	18353400	4.04805	124	5.20305	252	80.3934	-9.44451	1	-677	929	52.9613
227	M	N	67	N	N	T2	M0	IB							Adenocarcinoma								0.274273	0.257375	14.7887	57.4596	27.2947	40.4475	54.3783	62.1772	4626	15.7596	0.229239	5856.88	1.26608	5013	-656	-108	1098996482	5.00127	300	2.70762	296	172.188	-418.417	-458	-977	1273	124.989
228	F	N	76	N	N	T2	M0	IB		2.2			8.34	0.23	Adenocarcinoma	+	+	-		-	0.5		0.844645	0.816859	9.9283	12.1542	14.1421	14.4222	15.5242	16.2788	766.542	10.266	0.686764	589.794	0.769422	785	-65.6	294.2	32912342	4.39997	162	4.46061	460	110.578	141.715	172	-406	866	68.9887
229	F	N	78	N	N	T1	M0	IA		0.6			9.03		Adenocarcinoma								0.781905	0.632896	5.53176	8.74039	9.48683	10.198	9.05539	10.247	186.667	6.83415	0.678837	232.682	1.24651	200	-642.3	-241.7	45222154	4.58702	208.75	3.37441	47	128.518	-446.41	-451.5	-844	891	88.0875
230	F	N	77	Y	N	T1	M0	IA			1138		2.54	0.29	Adenocarcinoma								0.71704	0.559166	6.88251	12.3085	14.3178	13.4164	13.4164	17.4929	262.292	8.8257	0.451262	439.115	1.67415	286	-222.5	158	6604924	4.46017	174.5	3.8354	271	116.54	-12.3427	9	-590	861	77.9714
231	F	N	74	N	N	T2	M0	IIA							Adenocarcinoma								0.776568	0.680681	28.4466	41.7914	45.3542	50.2892	53.0094	61.2699	23028.7	32.4539	0.377216	10377.1	0.450614	22979	-54	107	138056438	3.47067	82	9.05168	312	53.1017	24.9152	30	-660	972	34.5391
232	F	N	67	N	N	T2	M0	IB		1.1			7.42		Adenocarcinoma								0.785762	0.630535	34.0009	53.9239	56.9386	62.434	63.561	74.1687	44830.5	42.3714	0.365215	16710.3	0.372745	44287	-387	92	1851258466	4.49602	210	4.00859	372	149.561	-76.0774	-2	-1055	1427	97.7138
233	M	N	56	Y	N	T1	M0	IA		1.1					Adenocarcinoma								0.874907	0.614559	12.286	19.9916	22.2036	21.2132	26.6271	27.8747	2588.58	17.4908	0.52276	1744.04	0.673743	2590	-675	-205.9	671956222	4.76322	243	3.20311	193	145.831	-475.849	-517.5	-838	1031	101.506
234	M	N	54	N	N	T2	M0	IB							Adenocarcinoma								0.744996	0.522191	13.4368	25.7315	36.0555	30.5287	38.833	40.8044	3056.29	19.1699	0.403652	2523.13	0.825553	3160	-119.1	77.1	28889953	3.73287	89	8.78232	295	65.0583	-16.2199	-3	-632	927	38.0586
235	M	N	60	Y	N	T2	M0	IB		2.9			10.07	2.17	Squamous cell carcinoma								0.826484	0.321451	10.4495	32.5072	35.3553	40.4969	39.0512	48.1456	2414.12	26.8667	0.243149	3579.2	1.48261	2576	-256.5	98	66277368	4.49405	195	2.94995	390	111.887	-80.6165	-74.5	-634	1024	79.9717
236	F	N	75	N	N	T1	M0	IB					7.87		Adenocarcinoma								0.440807	0.347244	9.3163	26.8293	30.4138	16.4924	30.0167	37.4967	1262.25	11.8265	0.357489	1579.98	1.25172	1325	-152	77	13316722	3.89144	115	4.23629	213	72.842	-33.594	-23	-509	722	48.8925
237	F	N	80	Y	N	T1	M0	IB		2.3	128.36	800	19.18	0.52	Adenocarcinoma								0.726626	0.704349	30.1167	42.7582	52.1536	44.911	56.2939	57.3585	7535.5	31.0693	0.152982	12150.2	1.6124	7872	-616	71	1173808672	5.32658	409.25	2.1423	456	214.951	-289.602	-304.5	-994	1450	164.351
238	F	N	46	N	N	T1	M0	IA							Adenocarcinoma								0.938197	0.795673	80.2268	100.829	124.326	147.851	135.085	158.095	450948	94.5974	0.160505	177179	0.392904	427885	-87	116	3055574862	3.74313	106	5.6188	924	64.0322	15.6617	19	-783	1707	43.9902
239	F	N	56	N	N	T1	M0	IA							Adenocarcinoma	+	+						0.760698	0.387839	3.16789	8.16803	8.544	6.7082	8.94427	9.43398	41.8333	6.21341	0.474302	122.869	2.93712	55	-330.4	55.2	2225645	4.14171	229	2.56008	263	130.99	-122.782	-100	-455	718	92.3548
240	M	N	66	N	N	T2	M0	IB		1.9			6.15		Adenocarcinoma								0.918892	0.794676	11.9247	15.0057	17.2627	18.6011	17.0294	19.4422	1629.92	13.7886	0.660563	1013.94	0.622083	1642	-170	81	23187717	3.89296	94.5	8.2512	302	79.2158	-21.6754	3	-801	1103	42.7712
241	F	N	46	N	N	T1	M0	IA		1.2			7.51		Adenocarcinoma								0.590164	0.526235	16.2332	30.8478	24.7386	47.5184	46.0435	47.5605	4453.17	18.2052	0.406091	3223.34	0.723831	4348	-312	92	150865051	4.37921	139	6.39872	279	123.923	-58.3126	-8	-909	1188	67.4207
242	F	N	62	N	N	T2	M0	IB	2.2	0.9	7.09	4.24	9.13		Adenocarcinoma								0.764161	0.524866	12.2573	23.3531	30.0832	28.1603	27.0185	30.0998	2901.38	17.8455	0.536231	1834.57	0.632311	2955	-190	78	50142726	3.95929	99	7.43151	245	85.9902	-33.5709	-4	-749	994	45.8088
243	F	N	52	N	N	T2	M0	IB		1.5			14.77		Adenocarcinoma								0.943206	0.590815	14.6933	24.8696	30.0832	29.4109	32.6956	34.1906	3977	23.4572	0.286103	4242.92	1.06686	4088	-437	-12	342218253	4.67435	240	2.38011	234	132.73	-241.249	-257	-679	913	98.817
244	F	N	60	N	N	T2	M0	IB	0.6	2.6	21.35	4.88			Adenocarcinoma								0.457303	0.284976	16.1671	56.7314	35.8469	65.0692	37.6962	65.9545	8418.12	25.9434	0.24327	8226.34	0.977217	8595	-299	87	241745187	4.43385	193	3.69465	359	121.878	-67.7148	-22	-706	1065	82.816
245	M	N	38	N	N	T2	M0	IIA							Adenocarcinoma		-	-	+		0.8		0.533771	0.210054	13.7446	65.434	40.7922	76.0592	60.208	80.206	9191.79	34.9268	0.297432	7134.49	0.77618	9106	-115	103	96373543	3.93289	109	8.10845	623	72.4567	-9.36756	-2	-863	1486	44.9968
246	F	N	54	N	N	T2	M0	IB		1.4			6.08		Adenocarcinoma								0.567096	0.381938	8.90868	23.3249	26	24.2074	22.2036	27.313	1355.62	13.2275	0.475962	1244.53	0.918049	1412	-723.9	4	320166545	5.30383	397	2.17394	219	220.872	-396.661	-437	-980	1199	167.146
247	M	N	31	N	N	T2	M0	IIA							Adenocarcinoma								0.69614	0.61611	6.31892	10.2561	10.2956	10.8167	10.6301	12.7279	267.5	7.13972	0.673269	298.202	1.11478	279	-277.2	87.8	7306973	4.3082	148.5	4.55068	188	109.371	-66.9211	-35	-615	803	66.8928
248	M	N	65	N	N	T2	M0	IB							Adenocarcinoma								0.72589	0.598504	16.1965	27.0617	38.0132	28.2312	28.0179	40.6202	2237.92	19.6438	0.257502	3213.16	1.43578	2370	-203.1	121.1	43815959	4.3826	166	4.31924	420	102.639	-29.8561	-13	-676	1096	69.2782
249	F	N	64	N	N	T2	M0	IB		3.1			4.55	0.1	Adenocarcinoma								0.843275	0.712135	11.0391	15.5015	19.7231	16.5529	20.8806	21.7715	877.75	13.072	0.355303	1247.76	1.42155	905	-753.6	-442.4	357854062	4.20156	158	4.29218	-34	96.6881	-616.599	-639	-871	837	66.3569
250	F	N	81	N	N	T1	M0	IA		4.6	72.59		18.11		Adenocarcinoma								0.754798	0.472312	10.8515	22.9754	24.6982	25.9615	24.8395	29.9666	1603.08	17.3418	0.294402	2249.99	1.40354	1649	-694	-188.4	463069069	4.80988	249	3.51352	244	157.822	-491.226	-544	-922	1166	107.788
251	F	N	28	N	N	T1	M0	IA		0.8			8.35		Adenocarcinoma	+	+	+		-	0.5		0.720633	0.550195	5.22686	9.50002	10.4403	10	9.48683	11.225	144.458	6.84604	0.57137	233.021	1.61307	160	-671.2	-378.7	47691942	4.10542	155.25	5.44789	7	98.1081	-531.15	-549	-753	760	67.9476
252	F	N	59	N	N	T1	M0	IA							Adenocarcinoma							1.08	0.894684	0.685188	7.40502	10.8073	12.8062	12.6491	13.4164	15.7797	414.708	9.6691	0.612936	438.764	1.05801	435	-182.6	116.2	6816955	4.16051	127	4.501	249	90.9955	-24.508	-9	-508	757	57.0784
253	F	N	32	N	N	T1	M0	IA		0.7			3.65		Adenocarcinoma	-	-	-		+	0.25		0.741619	0.52441	19.7009	37.5677	44.9222	39.0512	43.0813	45.8148	12775.2	27.861	0.535229	4937.7	0.386505	12918	-64	95	73349376	3.48407	80	9.47918	404	52.9518	13.4237	17	-653	1057	33.8175
254	M	N	51	N	N	T4	M0	IIA		1.9			14.21	0.25	Adenocarcinoma	+	+	+	-	-	0.5		0.829074	0.738011	14.5543	19.7209	27.074	30.0666	30	30.8221	1833.25	16.3501	0.335863	2156.77	1.17647	1941	-284	115	57413089	4.62579	211	3.47327	324	126.588	-65.1875	-34	-719	1043	87.6707
255	M	N	84	Y	N	T2	M0	IB		3.5				0.25	Adenocarcinoma								0.725908	0.651302	5.11175	7.84852	8.60233	8.544	7.2111	9.16515	139.833	5.6973	0.758723	171.715	1.228	147	-619.8	-202.6	32225417	4.5556	214	3.23297	97	131.646	-438.293	-470	-821	918	91.9592
256	M	N	60	Y	Y	T2	M0	IIA	9.6	1.5			13.04		Adenocarcinoma								0.916485	0.762928	12.6201	16.5417	21.3776	27.1662	24.6982	30.2985	1388.92	15.1602	0.410721	1465.73	1.05531	1469	-567.2	58	143366751	5.08474	349	2.41932	213	196.15	-206.496	-149	-877	1090	147.549
257	M	N	71	N	N	T2	M0	IIA							Adenocarcinoma								0.479849	0.351874	7.01769	19.9438	13.8924	19.6977	19.3132	22.3159	512	9.56999	0.47995	644.864	1.2595	522	-347	150.7	25084340	4.84778	309.5	2.05767	331	161.687	-110.69	-126.5	-545	876	125.447
258	M	N	73	N	N	T2	M0	IIA							Other								0.675219	0.622052	3.8852	6.24579	6.7082	8.06226	6.08276	8.06226	40.875	4.21727	0.671302	85.4813	2.09129	49	-675.8	-345.2	14462765	3.92043	133	5.33958	-61	102.595	-524.429	-553	-761	700	59.9237
259	F	N	56	N	N	T3	M0	IB		2.1			12.27		Adenocarcinoma								0.53007	0.480697	12.3998	25.7954	32.5576	33.2415	20.3961	34.6699	2119.79	13.6734	0.502733	1587.36	0.748828	2103	-113	107	24701884	3.91651	105	7.61338	387	75.0154	-2.1902	11	-600	987	44.137
260	M	N	79	N	N	T2	M0	IIA	1	101.9	34.24	8.3			Adenocarcinoma								0.668505	0.454966	9.74967	21.4295	23.7697	19.2354	23.6008	25.0799	712.958	14.3257	0.234388	1646.61	2.30955	845	-762.6	-431	354496640	4.22536	145	7.07828	153	108.916	-629.983	-674	-880	1033	65.2667
261	F	N	58	N	N	T2	M0	IB		2.1			10.16		Adenocarcinoma								0.833357	0.689017	39.0302	56.6462	65.7647	62.1691	64.2573	67.72	43746.2	47.2065	0.25624	23431.3	0.53562	43422	-419	85	1942089332	4.24132	127	5.14013	409	148.136	-66.5083	10	-1004	1413	79.9591
262	M	N	81	Y	N	T2	M0	IB							Adenocarcinoma								0.696758	0.653563	13.6123	20.8278	19.2354	24.5153	21.1896	25.7099	1551.79	14.512	0.398235	1627.67	1.0489	1580	-726.1	-156.9	450556960	4.93262	293	2.87959	140	173.77	-489.482	-540.5	-872	1012	124.094
263	M	N	70	N	N	T3	M0	IB							Adenocarcinoma								0.731225	0.687047	8.15246	11.8659	13.9284	13.4164	10.8167	14.0712	489.583	8.67667	0.604987	496.542	1.01421	500	-637.1	-185.6	109469686	4.65134	217.5	3.12683	195	133.148	-436.832	-460	-776	971	92.3752
264	M	N	70	Y	Y	T1	M0	IA	2.1	1.3	5.78	3.38			Adenocarcinoma	+	+	+	-	-	0.1		0.698198	0.307375	8.03104	26.1278	34.0147	22.2036	33.0151	34.7275	1277.88	18.2424	0.340602	1671.97	1.3084	1333	-445	2	116116363	4.77002	250	2.45962	216	141.82	-240.295	-255	-774	990	104.311
265	F	N	64	N	N	T2	M0	IIA		5.5			7.12		Adenocarcinoma								0.948701	0.710874	26.274	36.9601	48.8774	61.0328	47.1699	62.9682	14212.1	35.0641	0.224823	12620.7	0.888022	14436	-533	80	1190637986	4.93248	381	2.34341	575	204.967	-160.972	-65	-979	1554	158.878
266	M	N	31	Y	N	T2	M0	IIA		1.9			9.91	0.11	Adenocarcinoma								0.806697	0.49841	15.3805	30.8592	36.1248	33.6006	35.6931	38.8072	5696.92	24.894	0.250729	6152.33	1.07994	5733	-587	11.8	843229581	5.08486	400	1.99676	504	198.5	-307.576	-341	-918	1422	158.078
267	F	N	69	N	N	T2	M0	IB		1.6	5.14	17.24	10.08	0.2	Adenocarcinoma								0.711764	0.51673	27.7917	53.7838	53.4135	63.8905	63.5138	66.3702	29604.8	38.2813	0.377343	12264.7	0.41428	29846	-50	92	193384278	3.37952	66	14.9662	726	50.2736	18.7273	26	-819	1545	28.5831
268	F	N	46	N	N	T1	M0	IA					6.89		Adenocarcinoma	+	-	+		+	0.4		0.742795	0.495685	7.76133	15.6578	17.4929	16.1245	16.1245	17.9444	555.083	11.6305	0.391373	834.575	1.50351	598	-28.9	142	6392320	3.366	79.75	8.47753	217	54.5954	69.8796	86	-397	614	33.3106
269	F	N	49	N	N	T2	M0	IIA							Adenocarcinoma								0.763752	0.704403	6.05844	8.60082	11.1803	9.48683	9.84886	11.225	189.792	6.56889	0.710715	224.719	1.18403	201	-516	-145	26716340	4.39134	228	2.14843	-57	119.558	-336.129	-328	-717	660	91.8966
270	M	N	62	N	N	T2	M0	IB		3.2			7.16	0.48	Adenocarcinoma								0.716978	0.631087	5.74835	9.10865	8.544	8.24621	9.43398	11.5326	85.8333	6.5307	0.411806	228.505	2.66219	107	-662.2	-431.8	34530568	3.73427	124.5	2.89502	-308	74.3883	-560.43	-577	-747	439	51.0829
271	M	N	69	N	N	T1	M0	IA							Adenocarcinoma								0.807201	0.619666	8.58643	13.8565	15.8114	15	15.6205	17.9444	674.208	11.185	0.462981	803.127	1.19121	694	-747.1	-415.6	256145264	4.39168	181.5	4.26754	-22	110.698	-590.648	-618	-870	848	74.5024
272	M	N	46	N	N	T2	M0	IIA							Adenocarcinoma								0.637311	0.565097	19.7893	35.0193	46.8402	47.2017	58.8982	61.1065	6849.79	22.3182	0.359345	4853.9	0.708621	6960	-156	126	112896513	4.22021	129	6.62077	437	90.9799	-6.61624	11	-737	1174	55.2441
273	M	N	50	N	N	T3	M0	IIIA	1.6	0.8	9.39	3.04	16.13	0.32	Adenocarcinoma	-		-		-	0.9		0.825167	0.721326	37.5511	52.0584	58.3095	53.6004	60.5392	67.6609	53804.4	42.9569	0.353672	19487.7	0.362196	52657	-138	98	1189474427	3.91518	94	10.8156	1093	91.4093	-16.8331	17	-953	2046	41.3
274	M	N	68	Y	N	T2	M0	IB		1.1			5.95		Adenocarcinoma								0.790792	0.73501	11.8287	16.0933	30.0832	15.6525	26.0768	31.6386	1606.96	12.7265	0.726224	913.587	0.568519	1647	-67	86	10376118	3.42901	64.5	9.74098	255	51.3345	3.98786	8	-441	696	28.1682
275	F	N	83	N	N	T2	M0	IB		12.9	58.57	0.81			Adenocarcinoma	+	-	-	-		0.6		0.832326	0.495052	5.77702	11.6695	13	13.4536	13.0384	13.6015	269	9.71283	0.433857	464.486	1.72671	285	-205.8	71.6	4504745	4.0355	140	3.71593	156	90.14	-49.1614	-23	-439	595	59.3058
276	M	N	73	Y	N	T2	M0	IB		231.2			10.94	0.11	Adenocarcinoma								0.823007	0.559152	20.1534	36.0427	45.4533	43.4166	52.7731	52.811	12323	29.6634	0.328423	7855.91	0.637498	12229	-121	86	100400841	3.75565	100	6.25805	296	66.657	-10.0889	4	-618	914	42.5131
277	F	N	51	N	N	T3	M0	IB		2.7	9.68	31.58	8.59	0.56	Adenocarcinoma								0.773716	0.71811	37.8966	52.7727	63.9766	57.2713	57.1402	66.7383	49669.2	40.8311	0.323834	20178.4	0.406255	48138	-68	100	239394400	3.45949	87	5.34452	338	52.7989	17.7997	22	-666	1004	36.2651
278	F	N	46	N	N	T1	M0	IA		1.1			6.69		Adenocarcinoma								0.779362	0.619939	19.0037	30.6541	36.2353	40.4599	36.7696	42.1782	7875.83	23.8906	0.510632	3748.93	0.476004	8071	-67	102	66735079	3.5986	79	10.7459	382	59.1244	12.6533	22	-675	1057	33.4103
279	M	N	42	Y	N	T2	M0	IB		2.2			4.2		Adenocarcinoma								0.733944	0.520568	20.4503	39.2845	42.0476	52.2015	55.2178	63.4823	10643.2	28.8326	0.368887	6343.17	0.595983	10632	-501	70	682803232	4.62099	242.25	3.76594	312	178.273	-118.097	-23	-970	1282	116.394
280	F	N	41	N	N	T3	M0	IB					6.7		Adenocarcinoma	+	+	+			0.1		0.911756	0.798113	10.8931	13.6486	16.1555	17.2627	17.1172	17.2916	1170.21	12.4442	0.602334	891.57	0.76189	1184	-14.7	200.7	21043425	3.81911	108.25	4.90107	318	69.5278	96.3978	108	-327	645	45.5202
281	M	N	78	Y	N	T3	M0	IB		4.7			5.96		Adenocarcinoma								0.9106	0.690937	9.46671	13.7013	21.095	15.2643	19.4165	22.2935	766.75	12.4764	0.46226	876.396	1.143	792	-627	-48.4	141944188	5.05772	342	2.26911	242	184.373	-362.472	-398	-855	1097	139.123
282	F	N	73	N	N	T2	M0	IIA		0.8			6.58		Adenocarcinoma								0.666296	0.255557	4.31585	16.888	20.0998	13.3417	19.0263	20.1246	293.667	11.2524	0.34678	616.122	2.09803	332	-842.8	-702.2	197657332	3.24943	77.5	6.98814	-440	48.4176	-768.88	-774	-943	503	32.1599
283	M	N	79	N	N	T2	M0	IB				62.94		1.27	Adenocarcinoma								0.804226	0.664964	15.8084	23.7734	28	30.8058	38.6005	40.694	4159.54	19.1192	0.487118	2567.71	0.617307	4211	-59	93	26058967	3.45899	75	9.5293	274	52.7401	13.1553	19	-558	832	31.0213
284	M	N	77	Y	N	T2	M0	IB		57.2			9.59	0.13	Adenocarcinoma								0.716727	0.458689	15.4342	33.6484	36.4005	39.9625	36.8782	44.4297	5084.5	24.1167	0.238687	5990.83	1.17825	5285	-650.6	35	929193515	5.26866	423	2.00847	319	218.074	-333.431	-365	-926	1245	170.556
285	F	N	54	N	N	T3	M0	IB							Adenocarcinoma								0.746759	0.645512	7.49143	11.6054	11.0454	14.3178	13.6015	14.7986	453.25	8.66645	0.689293	413.973	0.913344	469	-99	68	2859167	3.52501	83	5.4932	165	55.2744	-16.6674	-11	-381	546	34.308
286	M	N	75	N	N	T3	M0	IB		5.6			10.23		Adenocarcinoma								0.245979	0.220385	17.3223	78.6001	56.8243	51.8652	29.1204	81.9634	15627	19.334	0.388252	7785.51	0.498209	15502	-15	195	290609991	3.85476	100	9.62257	398	71.8548	87.5658	101	-700	1098	42.3445
287	M	N	70	Y	N	T1	M0	IA							Adenocarcinoma	+	+	+		-	0.1		0.592987	0.479388	9.65003	20.1299	24.6982	16.1555	19.6469	25.2389	1177.38	11.9368	0.571951	942.761	0.800731	1209	-179.2	84	17860642	4.01873	110	5.93093	221	83.3186	-34.0645	-12	-561	782	48.9978
288	F	N	49	N	N	T1	M1	IV		1.6			7.42		Adenocarcinoma								0.786693	0.710903	9.58814	13.4873	17	15.8114	15.2971	19.3391	609	10.6103	0.493611	703.9	1.15583	643	-741.8	-145.8	206880440	4.8804	297.5	3.01944	147	189.008	-517.717	-596	-901	1048	135.204
289	F	N	33	N	N	T4	M1	IB		2.5	25.08	30.06	16.36		Adenocarcinoma								0.779996	0.559931	12.0651	21.5475	26.2488	21.095	29.7321	29.7321	2539.5	16.8069	0.543017	1657.69	0.652761	2561	-581	55	313287130	5.15302	384	2.00095	215	198.693	-260.591	-256	-849	1064	154.659
290	M	N	62	Y	N	T2	M0	IB		1.8	19.13				Adenocarcinoma								0.857365	0.644323	5.65726	8.78017	9.21954	11.4018	12.083	12.8841	168.292	7.52781	0.498081	295.955	1.75859	181	-646	-193	49412615	4.29901	161	5.05289	154	136.052	-488.238	-551	-771	925	78.6098
291	F	N	58	N	N	T4	M1	IV		1.4			11.31	0.39	Adenocarcinoma	+	+	+		-	0.8		0.618632	0.539154	13.8543	25.6963	30.0666	21.6333	33.6155	38.1051	3219.33	15.8965	0.424264	2485.18	0.771956	3245	-117	85	25653882	3.76852	102	6.4542	287	65.1321	-14.9103	-6	-690	977	42.6354
292	M	N	55	Y	Y	T1	M0	IA		2.4			12.7		Adenocarcinoma								0.72578	0.577563	17.1822	29.7495	34.9285	36.3593	35.5106	39.8999	3961.33	21.5916	0.193427	6259.34	1.58011	4346	-719	-158.5	1290947547	4.93771	274	3.58225	298	174.706	-498.048	-559	-1011	1309	117.934
293	F	N	56	N	N	T3	M0	IB		6.6			6.99		Adenocarcinoma							0.89	0.704388	0.464868	3.98202	8.56591	7.28011	8.24621	9.43398	9.48683	99.9167	6.03372	0.670369	155.332	1.55462	110	-630.5	-60.4	20956719	4.67217	329.75	2.4825	201	187.369	-373.864	-441	-729	930	138.186
294	F	N	78	N	N	T3	M0	IB		2	6.95		4.03	0.16	Adenocarcinoma								0.728218	0.628818	5.99626	9.53577	11.0454	8.60233	12.6491	12.6491	228.833	6.94412	0.647208	279.546	1.22161	236	-114	105	2097095	3.79639	123.75	6.02092	220	71.8125	-7.37712	-6	-470	690	50.3829
295	M	N	65	N	N	T4	M1	IV	4.9	1.5	12.06				Other								0.757156	0.659733	15.1573	22.975	29.7321	26.2488	25.807	33.8526	3443.38	17.3956	0.529072	2084.29	0.605306	3499	-59	90	20344951	3.37436	68	11.0049	232	50.4268	16.4513	25	-548	780	29.4706
296	F	N	30	N	N	T4	M0	IV		2.5			4.01		Adenocarcinoma								0.577463	0.42721	8.00252	18.7321	21.5407	16.1245	22.0907	24.3516	920.833	10.8171	0.53618	853.678	0.927071	937	-530	-29	116596874	4.80653	307	2.0866	204	157.524	-300.137	-318	-740	944	122.277
297	F	N	51	N	N	T4	M0	IB		1.2	11.06				Adenocarcinoma								0.87941	0.56466	17.0433	30.1834	37.1618	37.3363	41.3401	45.5851	6237.46	26.5435	0.263851	6210.56	0.995687	6270	-116	135	75213819	4.06977	129	6.45486	396	81.2761	10.3963	20	-664	1060	53.5778
298	M	N	60	N	N	T3	M0	IB							Adenocarcinoma								0.907433	0.803485	22.7647	28.3324	41.2311	31.6228	46.6905	49.558	9611.29	25.7098	0.338841	6451.73	0.671266	9390	-98	116	83701024	3.8702	111	6.67894	520	69.7495	7.68754	13	-724	1244	45.9025
299	M	N	57	Y	Y	T2	M0	IB		4.7	12.39	0.08	6.18	1.84	Adenocarcinoma								0.745231	0.611913	9.47991	15.4923	17.72	17.088	17.1172	19.7231	237.875	11.5453	0.263537	704.49	2.9616	322	-697.7	-201.1	85855293	4.80574	286.75	2.8376	70	162.068	-475.978	-514	-930	1000	114.733
300	F	N	58	N	N	T4	M1	IB		3.3			8.03	0.13	Adenocarcinoma							0.16	0.754087	0.663831	16.0642	24.1992	26.9258	31.1448	25.632	32.1559	3507.12	18.2483	0.364451	3062.99	0.873362	3570	-665	-114	793647025	5.00867	300.5	2.806	270	172.129	-421.29	-460	-964	1234	123.213
301	M	N	51	Y	N	T1	M0	IA		31.5		11.1	5.15		Adenocarcinoma								0.808807	0.696408	17.8818	25.6772	32.8938	29.6816	32.9848	38.9487	6092.08	20.7679	0.446849	3609.94	0.592563	6222	-547	78	459593773	4.64304	302	3.1079	257	197.838	-127.796	-17	-1011	1268	138.157
302	M	N	77	Y	N	T4	M1	IV		6.1	10.77	17.56			Adenocarcinoma							0.03	0.751418	0.638356	8.60932	13.4867	17.088	12.8062	14.4222	17.1172	402.5	10.1342	0.382375	689.455	1.71293	438	-670	-333.5	129427363	4.30996	175.75	5.397	108	107.195	-525.18	-553.5	-795	903	71.8431
303	M	N	63	Y	N	T1	M0	IA							Adenocarcinoma								0.841534	0.573165	6.49095	11.3248	12.083	13.0384	13.0384	14.6969	371.375	9.53017	0.594451	420.317	1.13178	385	-599.2	-108.2	70481744	4.80573	249	2.61223	108	150.585	-385.844	-398	-877	985	108.372
304	M	N	75	Y	N	T3	M0	IB		4.4	26.79		16.18	0.2	Adenocarcinoma								0.707364	0.542963	7.17618	13.2167	12.53	17.088	13.1529	18.6279	337.417	9.34901	0.416743	562.419	1.66684	369	-652.4	-219.2	88721998	4.7307	228	4.04963	185	141.386	-455.22	-487	-832	1017	94.3214
305	F	N	69	N	N	T2	M1	IV		2.1			8.61		Adenocarcinoma	-	-	-		+	0.6		0.781482	0.635816	19.9821	31.4275	32.0624	40	37	41.4849	8895.83	24.56	0.482211	4305.64	0.484007	9069	-45	96	57604713	3.36428	69	15.4542	388	49.6773	20.3243	25	-665	1053	29.2178
306	F	N	66	N	N	T4	M1	IV		0.9			7.2		Adenocarcinoma								0.834118	0.696681	7.7366	11.1049	14.3178	12.2066	13.4164	14.7986	367	9.26282	0.469274	528.245	1.43936	396	-666	-272.5	104059093	4.50989	178.25	3.74257	42	119.183	-488.351	-513	-860	902	77.1659
307	M	N	59	Y	Y	T2	M0	IB							Adenocarcinoma								0.667309	0.532257	9.40821	17.6761	16.4924	22.561	22.8035	23.6854	949.875	11.7954	0.438098	1066.65	1.12294	1006	-643	-122.5	207758135	4.93223	282.75	2.60148	170	160.676	-409.868	-438	-886	1056	115.826
308	M	N	64	Y	N	T2	M0	IB		1.7			12.44	0.34	Adenocarcinoma								0.895997	0.769107	10.8587	14.1185	17.088	18.6815	18.9737	20.6398	1263.67	12.6502	0.733189	770.944	0.610085	1285	-495.8	22	92472163	4.70256	309	2.47113	134	167.51	-181.209	-116	-794	928	127.504
309	M	N	75	Y	N	T4	M1	IB	3	1.4	10.52	29.18			Adenocarcinoma	+	-	-		+	0.3		0.841058	0.657651	27.8251	42.3098	52.8394	54.7083	46.4004	57.8014	27674.7	35.585	0.5526	8006.85	0.289321	27953	2	128	223003842	3.21761	56	11.7935	500	44.2541	56.2058	57	-574	1074	24.2333
310	F	N	77	Y	N	T4	M1	IB		486.9			7.81		Adenocarcinoma	+	+	+		-	0.5		0.723973	0.642188	22.0373	34.3159	43.9318	35.7771	36.6197	45.5851	9790.75	24.8438	0.285673	7747.44	0.791302	9528	-134	119	101933119	4.0514	132	4.16669	387	79.8452	-5.05552	2	-538	925	54.2906
311	M	N	58	N	Y	T2	M1	IB		1.8			10.23	0.5	Adenocarcinoma								0.654735	0.414876	17.8294	42.9751	54.0833	39.4081	44.0454	57.7148	9954.75	28.1373	0.268949	8320.85	0.835868	9962	-102	91	73942262	3.73562	95	6.55643	353	62.9578	-6.1311	0	-587	940	40.2423
312	F	N	67	N	N	T2	M1	IB							Adenocarcinoma								0.685434	0.636473	13.7229	21.5608	31	19.3132	34.1321	34.1321	2514.62	14.7785	0.552756	1617.83	0.643369	2569	-88	104	20935538	3.72348	93	8.69031	283	63.542	7.39354	17	-609	892	39.2972
313	F	N	75	N	N	T1	M0	IA		3			9.1		Adenocarcinoma								0.960567	0.856145	20.535	23.9854	42.7551	32.573	48.5077	48.5077	6586.54	23.0396	0.398452	4264.62	0.647474	6561	-105	115	61792283	3.88986	111	6.91319	315	71.2397	5.20881	13	-719	1034	46.3176
314	M	N	68	N	N	T1	M1	IA		4.1			4.19		Adenocarcinoma								0.724013	0.406353	7.83059	19.2704	19.9249	20.8087	20.2485	23.9374	544.333	13.952	0.270789	1190.59	2.18725	638	-672	-275.6	187322136	4.44615	174.5	5.02744	212	124.306	-515.68	-563.5	-822	1034	76.0447
315	F	N	67	N	N	T1	M0	IA					7.28		Adenocarcinoma								0.760674	0.397052	16.809	42.3346	36.6879	48.7955	41.6293	51.6236	3715.71	32.2028	0.168322	6892.41	1.85494	3909	-671	-97.6	911025337	5.05356	301	2.94071	316	179.19	-429.059	-476	-918	1234	126.44
316	F	N	55	N	N	T1	M0	IA	0.8	4.3	8.58	29.02			Adenocarcinoma								0.507706	0.410765	10.3545	25.2079	29.1548	19.6469	22.4722	31.4006	1734.33	12.7982	0.491458	1420.43	0.819006	1802	-119	74.9	14687409	3.71443	93	7.43128	521	63.4738	-17.5999	-9	-485	1006	39.4332
317	M	N	61	N	N	T1	M0	IA		2.9			6.8		Adenocarcinoma								0.915817	0.771444	13.6849	17.7393	21.4709	18.868	20	21.6795	942.75	16.2459	0.226813	2049.97	2.17446	1036	-738.5	-316.5	341391593	4.7245	204.25	4.59701	217	134.474	-546.302	-579	-1009	1226	88.3787
318	F	N	77	N	N	T1	M1	IA		2			13.82		Adenocarcinoma								0.937365	0.586786	8.23928	14.0414	16.6433	18.868	15.2643	19.9499	659.167	13.1619	0.451394	811.443	1.23101	692	-577.8	78.9	74104989	5.08946	439	2.04647	267	220.986	-206.195	-148	-884	1151	174.938
319	F	N	44	N	N	T2	M0	IB		0.7			10.23		Adenocarcinoma							1.04	0.425889	0.37267	11.5282	30.9341	25.6125	30.3645	22.8254	34.9571	965.792	13.1745	0.258879	1825.19	1.88984	1074	-567	-16	147246403	5.05956	326.75	2.43933	260	173.883	-304.755	-319.5	-941	1201	129.048
320	M	N	89	Y	N	T1	M0	IA		133.6	109.58	8.96			Adenocarcinoma								0.852993	0.712405	9.89842	13.8944	16.4012	17.72	17.0294	18.8149	915.583	11.8518	0.518035	880.218	0.961374	942	-619	-38.1	160114235	5.05914	351.5	2.1661	227	185.054	-349.247	-369.5	-950	1177	142.034
321	F	N	66	N	N	T1	M1	IA		1.2			11.4	0.54	Adenocarcinoma	+	+	+			0.2	0.12	0.550775	0.309239	12.8635	41.5975	48.3735	34.7131	50.774	51.1175	5012.92	22.9108	0.321936	4399.89	0.877711	5147	-162	99.4	66300660	4.06286	120	5.74192	304	82.6775	-19.2225	-1	-733	1037	52.134
322	F	N	72	N	N	T2	M0	IB							Adenocarcinoma	+	+	+		-	0.3		0.835922	0.687283	11.8814	17.2875	19.2094	19.2094	18.4391	22.4499	1199.92	14.451	0.363547	1502.07	1.25182	1230	-625.2	32	197074683	5.21812	395.75	2.05846	246	206.185	-317.78	-339	-905	1151	159.103
323	M	N	68	Y	N	T1	M0	IA	3.1	1		11.36	3.22		Squamous cell carcinoma								0.800409	0.611922	14.7433	24.0934	36.4005	28.2843	32.311	38.6005	2954.71	19.2846	0.393138	2532.89	0.857237	3058	-168.3	113	45616013	4.1609	122	5.55549	335	87.9085	-13.5556	5	-675	1010	53.1963
324	F	N	71	N	N	T1	M1	IA							Adenocarcinoma								0.821425	0.694101	11.2956	16.2737	18.4391	20.5913	18.868	22.0454	1123.92	13.3676	0.333333	1568.3	1.39539	1189	-753	-67.6	355100486	5.12521	357	2.75865	263	211.827	-481.867	-551	-920	1183	154.395
325	M	N	69	Y	N	T2	M1	IB		160.7					Adenocarcinoma								0.673727	0.530352	19.8754	37.4758	45.9674	36.0694	61.5873	62.442	7908.12	25.2484	0.36459	5264.96	0.665766	8081	-69	110	64518712	3.67846	88	9.84496	380	60.85	16.8294	22	-719	1099	37.1791
326	M	N	68	N	N	T2	M1	IB		45.3			6.6	0.34	Adenocarcinoma								0.946567	0.755435	9.99847	13.2354	17.4642	15.6525	16.2788	17.72	888.375	12.5282	0.496814	899.542	1.01257	928	-737.6	-254.7	296169259	4.77462	256.25	2.94096	48	149.87	-533.63	-572.5	-917	965	105.953
327	F	N	59	N	N	T2	M0	IB		5.9			10.18	0.61	Adenocarcinoma								0.848616	0.780792	13.2794	17.0076	22.8035	21.4009	19.9249	26.7021	2086.17	14.4329	0.655979	1203.63	0.576959	2138	-116	81.3	21690244	3.73704	87.75	9.02238	202	67.277	-12.45	3	-590	792	37.7676
328	M	N	75	Y	Y	T2	M1	IB							Adenocarcinoma								0.864708	0.536709	21.6818	40.3977	46.0977	55.2178	55.9017	60.6712	9622.08	34.9322	0.155403	14077.9	1.46308	10396	-661	-156	2606109024	4.84417	243	3.83282	365	158.038	-457.844	-510	-1040	1405	105.225
329	M	N	70	Y	Y	T1	M0	IA							Adenocarcinoma								0.714062	0.697753	60.2528	86.3526	102.215	84.0536	103.73	111.104	215470	61.6611	0.367609	47281.3	0.219433	213009	-80	113	1713146110	3.72608	99	9.78779	826	63.5791	15.0024	21	-812	1638	41.2322
330	F	N	68	N	N	T1	M1	IA		1.2			9.78	0.19	Adenocarcinoma								0.808142	0.554107	15.5405	28.046	36.4005	28.4605	33.9706	37.1484	4553.08	22.6651	0.361684	3673.03	0.806713	4596	-626	-93	967450329	4.88314	273	3.10917	252	165.402	-410.01	-460	-904	1156	115.43
331	M	N	45	N	N	T1	M0	IA	5.5	1	9.43	15.61		0.04	Adenocarcinoma	+	+	+	-		0.25		0.777305	0.577803	17.2961	29.9342	34.2053	37.4433	34.0147	38.6523	6900.46	23.268	0.479839	3652.92	0.529374	6990	-145	85	78700285	3.83568	88.75	7.09024	299	72.4332	-14.8986	4	-701	1000	40.0751
332	M	N	71	Y	N	T2	M1	IB		130.5			6.75		Adenocarcinoma								0.776996	0.502723	14.4955	28.8339	37.1214	30.4138	37.5766	40.6079	5252.17	22.4038	0.379801	3847.28	0.732513	5256	-617	-34	897035387	5.05914	348	2.16146	276	184.562	-350.711	-383	-846	1122	141.447
333	M	N	78	Y	N	T3	M1	IV	2.2	274.2	923.2	76.87			Adenocarcinoma								0.772884	0.735372	11.2828	15.343	16.1555	18.3576	16.1245	20.7123	1158.04	11.8584	0.44857	1188.88	1.02663	1144	-679	-119.3	275164228	4.97767	262.5	3.20234	212	166.932	-442.469	-483	-981	1193	113.125
334	F	N	72	N	N	T1	M1	IV		3.1			9.01	0.21	Adenocarcinoma							0.07	0.496343	0.306841	7.80891	25.4493	21.2132	20.6155	20.8087	28.6007	1078.83	12.6316	0.452175	1124.99	1.04278	1099	-666.2	-140.6	279914951	4.85439	265.5	3.30776	192	164.591	-460.683	-519	-909	1101	112.582
335	F	N	68	N	N	T2	M1	IV							Adenocarcinoma								0.830804	0.686094	39.744	57.9279	76.5506	73.0068	76.0592	79.4229	63396.7	48.1267	0.208286	36914.9	0.582284	63248	-554	89	4881026845	4.72915	342	2.71197	428	205.475	-131.127	-20	-1017	1445	149.521
336	F	N	67	N	N	T1	M1	IV		1.8			4.01		Adenocarcinoma								0.802233	0.616756	27.0558	43.8679	50.01	58.6941	57.7235	59.716	19533.9	35.1923	0.291086	12050	0.616878	19770	-80	113	211231940	3.80116	90	11.0248	392	67.6236	13.1278	23	-776	1168	38.6757
337	F	N	68	N	N	T2	M1	IV		2.1			4.23	0.1	Adenocarcinoma	+	+	+		-	0.2	0.73	0.83071	0.665929	13.7667	20.6729	25.4951	25.2389	27.2947	31.0644	2767.54	17.1732	0.595101	1601.85	0.5788	2814	-55	125	20411269	3.63067	91	5.13482	319	58.2575	34.6194	36	-402	721	38.1999
338	M	N	61	N	N	T2	M1	IV	2.3	2.5	9.39	4.7			Squamous cell carcinoma								0.522567	0.43094	16.9374	39.3034	34.176	37.6962	48.2701	50.5767	5024	20.5386	0.263951	5374.37	1.06974	5128	-207	103	94475743	4.31228	149.25	4.93769	302	98.0257	-38.9335	-18	-741	1043	63.5301
339	F	N	58	N	N	T1	M1	IV		1.1			10.18	0.31	Adenocarcinoma	+	+				0.2	0.17	0.805755	0.712099	5.8942	8.27722	8.544	8.94427	8.94427	10.198	73.3333	6.66941	0.452139	187.39	2.55532	89	-670.6	-255.4	22567074	4.32502	206	2.78997	-87	124.35	-479.258	-498	-722	635	88.0532
340	F	N	55	N	N	T2	M1	IV		6.8			7.31	0.09	Adenocarcinoma								0.585334	0.535697	23.235	43.3733	63.8905	39.2046	56.9386	71.9027	14626.2	25.3879	0.399029	7248.28	0.495567	14850	-71	85	74676624	3.40655	75	8.37774	428	50.4988	9.2299	16	-671	1099	31.8229
341	F	N	41	N	N	T2	M1	IV		1			4.42		Adenocarcinoma	-	-	-		+	0.45		0.858643	0.758577	10.3239	13.6096	16.7631	15.2315	16.1555	17.72	1060.38	11.6858	0.664915	756.295	0.713234	1084	-116.7	88	10739236	3.84498	102	6.74526	276	70.4488	-12.4963	0	-501	777	42.6664
342	F	N	49	N	N	T4	M1	IV		5.4			6.04		Adenocarcinoma								0.900434	0.691856	9.20537	13.3053	17.2627	17.0294	17.0294	17.2916	805.875	11.9806	0.514139	814.545	1.01076	816	-746	-287	295310717	4.6071	214	4.6837	140	149.855	-568.391	-633.5	-875	1015	93.8941
343	M	N	73	Y	N	T2	M1	IV		4.8			6.46	0.63	Adenocarcinoma	+	+	+			0.7		0.731026	0.647846	15.5325	23.9757	23.4307	30.3645	30.3645	35.1283	3279.62	17.5268	0.581219	1836.65	0.56002	3328	-57	186	52783495	3.94991	105	5.02695	466	73.8896	75.466	86.5	-425	891	45.8007
344	M	N	53	N	N	T3	M1	IV			11.21	32.4	8.32		Adenocarcinoma								0.885566	0.757237	14.8248	19.5775	22.561	27.2947	27.2947	29.1376	2409.79	17.3372	0.369476	2352.61	0.976272	2449	-623	40	406869108	5.19191	446	1.88818	295	219.024	-320.326	-361	-967	1262	175.854
345	F	N	76	N	N	T3	M1	IV		2.1			7.5		Adenocarcinoma								0.609781	0.575305	7.9429	13.8064	12.2066	14.7648	12.1655	15.1658	238.417	8.41889	0.394329	471.538	1.97779	271	-237	59	5867891	4.17209	169	2.63641	149	96.9998	-88.4391	-86	-455	604	71.231
346	M	N	50	N	N	T2	M1	IV		47.1					Adenocarcinoma								0.515781	0.410831	9.92767	24.1649	28.0179	20.8087	40	42.4971	1142.5	12.4638	0.400669	1319.07	1.15455	1211	-191	101	20557826	4.22188	129	5.69231	272	92.5793	-29.5376	-10	-668	940	57.3097
347	F	N	68	N	N	T2	M1	IV		1.8			6.8	0.33	Adenocarcinoma								0.803146	0.669146	10.1708	15.1996	20.025	19.0263	19.4165	20.2731	981.125	12.2075	0.524457	910.452	0.927968	1029	-836	-262.8	402328199	4.89885	340	2.58101	128	182.055	-586.65	-635	-915	1043	138.22
348	M	N	78	Y	N	T2	M1	IV		1.4			1.96		Adenocarcinoma								0.756389	0.601836	8.39516	13.9492	17.4642	15.1327	20.5183	23.6643	545.75	10.5511	0.475295	679.491	1.24506	585	-213.6	68	9977465	4.14165	141	4.5219	230	91.0113	-57.7145	-34	-650	880	61.0306
349	F	N	52	N	N	T3	M1	IV		0.9			9.73		Adenocarcinoma								0.820088	0.623689	13.7427	22.0345	28.0179	24.6982	27.5136	32.1714	3286.04	18.0702	0.542078	1971.84	0.600065	3316	-137	97.5	37646564	3.98719	122	6.58361	319	77.3645	-19.6743	-8	-759	1078	49.9538
350	F	N	47	N	N	T2	M1	IV		1.8			8.58	0.42	Adenocarcinoma	+	+				0.5		0.672443	0.462736	9.01404	19.4799	21.2132	26.3059	27.2947	28.5132	767.75	13.0991	0.335243	1209.5	1.57538	827	-659.4	-51.6	181226086	5.01159	322	2.58082	262	184.868	-411.183	-469	-870	1132	134.36
351	F	N	35	N	N	T3	M1	IV		6.9			11.1	0.24	Adenocarcinoma								0.829527	0.593316	5.50823	9.2838	10.4403	9.21954	12.8062	13.6015	143.875	7.70116	0.536738	247.388	1.71946	160	-659	-164.4	37725791	4.7505	286.75	2.93463	90	160.799	-443.569	-482.5	-757	847	115.989
352	F	N	72	N	N	T1	M1	IV					9.66	0.46	Adenocarcinoma								0.606062	0.520967	9.9594	19.1171	18.7883	20.6155	19.105	21.2368	671.875	11.5862	0.364816	1016.88	1.51349	745	-653.6	-312	199275002	4.4471	186	5.03161	162	112.678	-495.828	-525	-955	1117	75.0986
353	M	N	66	N	N	T2	M1	IV							Adenocarcinoma	+	+	+		-	0.2		0.74229	0.504298	2.35969	4.67916	5	4.47214	4.47214	5.09902	20.875	3.47329	0.783663	46.7849	2.24119	25	-822.4	-269.8	10108703	3.62347	287	3.15682	-16	180.509	-594.92	-670	-864	848	111.751
354	F	N	47	N	N	T2	M1	IV		1.4			6.41	0.41	Adenocarcinoma								0.805818	0.736253	8.94673	12.1517	13.6015	13.9284	13.6015	14.6969	601.292	9.79207	0.532451	647.035	1.07607	613	-731.4	-145.6	167904795	5.0489	335	2.65284	154	182.062	-473.264	-500	-878	1032	131.346
355	F	N	49	N	N	T2	M1	IV							Adenocarcinoma	+	+	+		+	0.3		0.692812	0.688173	21.9884	31.9518	32.9848	53.2353	60.7289	63.2614	7744.71	22.1366	0.417438	4534.84	0.585541	7966	-84	107	72432317	3.71731	86	8.8502	336	64.316	11.7488	24	-628	964	37.0259
356	M	N	81	Y	Y	T3	M1	IV		12.2			11.39	1.31	Squamous cell carcinoma								0.627718	0.508052	3.46091	6.81212	8.06226	5	8	8.06226	48.3333	4.27609	0.677592	94.6993	1.9593	53	-181.6	32.4	689560	3.65263	128	2.25432	110	72.4073	-75.5849	-66	-252	362	52.746
357	M	N	63	Y	Y	T2	M1	IV	2.5	14.7	8.55	132.2	38.56	0.24	Small cell lung cancer								0.698092	0.564994	8.15634	14.4361	16.1245	15	12	18.0555	674.708	10.0778	0.594404	625.864	0.927606	698	-712.3	-339.1	206851427	4.53349	197	2.96644	-39	116.096	-524.686	-529	-897	858	81.8978
358	M	N	58	N	N	T2	M1	IV		1.1			7.95	0.25	Adenocarcinoma	+	-	-			0.4		0.913762	0.856701	50.8641	59.3721	71.4213	69.6419	70.7248	74.0878	97703.7	54.2519	0.317052	32356.4	0.331169	97554	-101	103	812512671	3.80234	102	7.68822	395	66.5051	0.261752	7	-854	1249	43.0297
359	F	N	51	N	N	T2	M1	IV		2.6			8.87	0.24	Adenocarcinoma		+	-		-	0.9		0.827531	0.644702	28.5532	44.289	51	56.921	58.0086	60.8687	27508.2	36.6505	0.436364	10099	0.367125	27690	-86	102	194415407	3.6887	95	7.17819	352	61.2626	8.27212	14	-710	1062	39.6499
360	M	N	68	Y	N	T2	M1	IV					8.46		Adenocarcinoma								0.869365	0.847021	8.97771	10.5992	14.4222	12.3693	12.8062	14.9666	536.458	9.21453	0.628264	508.197	0.94732	548	-734	-504.9	219245655	3.90444	120.25	6.52602	-13	74.868	-624.706	-638	-884	871	49.6598
361	F	N	62	N	N	T2	M1	IV					4.75		Adenocarcinoma								0.78933	0.549992	10.4523	19.0044	20.025	22.561	21.095	23.3666	1616.75	15.0008	0.451463	1475.56	0.91267	1668	-629	-22	290909545	5.06613	374	2.01117	210	192.022	-351.839	-372.5	-835	1045	150.402
362	M	N	83	N	N	T3	M1	IV							Adenocarcinoma	+	-	+		+	0.2		0.884653	0.69696	14.3537	20.5947	26.6833	26.3059	28.8617	32.2955	2759.25	18.2191	0.378367	2514.38	0.911255	2731	-132	118	29426094	4.0577	133	4.03449	477	80.826	-6.10912	0	-468	945	55.4039
363	M	N	76	Y	N	T2	M1	IV		2.1	7.42		3.51	1.2	Adenocarcinoma								0.904726	0.854221	50.9546	59.6504	75.6108	74.8866	75.3127	79.278	109357	53.9672	0.452849	24420.9	0.223313	109197	-66	105	612479998	3.51516	87	7.38411	423	54.3357	19.389	23	-677	1100	36.5198
364	F	N	28	N	N	T2	M1	IV							Adenocarcinoma								0.763823	0.526629	11.6806	22.18	28.2312	21.6333	29.4109	32.5883	2124.79	16.9416	0.452421	1766.66	0.831449	2163	-126	87.8	18820130	3.8596	109	4.42221	237	69.2784	-17.0763	-12	-453	690	45.4208
365	F	N	75	N	N	T2	M1	IV							Adenocarcinoma								0.854218	0.641161	4.71211	7.34934	7.61577	9.48683	8.24621	9.53939	95.0417	6.27794	0.527113	191.069	2.01037	107	-815.4	-649.2	59447737	3.3562	83	3.11589	-566	53.7502	-742.196	-753	-883	317	35.1953
366	F	N	65	N	N	T2	M1	IV		1.5			5.36	0.63	Adenocarcinoma								0.870978	0.616532	27.8257	45.1327	54.0833	73.0068	57.3062	73.9865	29867.2	39.3096	0.475296	9794.51	0.327936	30160	-60	92	180415747	3.42094	74	11.4235	389	51.7674	15.2291	23	-763	1152	31.1474
367	M	N	65	Y	Y	T2	M1	IV		22.2			4.35	0.16	Adenocarcinoma							0.12	0.105158	0.0801658	8.60958	107.397	13.8924	13.6015	257.62	258.946	408.917	11.2937	0.541101	492.375	1.2041	438	-694.6	-355.3	131362741	4.45578	191.75	6.02571	296	114.38	-526.728	-537.5	-854	1150	78.625
368	F	N	50	N	N	T2	M1	IV	2.9	0.5	7.33	9.91			Adenocarcinoma	+	+	+		-	0.3		0.925255	0.735772	23.3459	31.7299	52.1536	44.6878	51.2445	54.1849	12998.6	29.3582	0.402447	6643.14	0.511065	13057	-84	94	97547484	3.6292	87	9.38668	363	60.0439	4.9336	14	-656	1019	36.7944
369	M	N	72	N	N	T1	M1	IV							Adenocarcinoma								0.94982	0.849667	15.7582	18.5463	21.6333	24.5153	21.6333	24.5967	1976.83	17.6157	0.305863	2490.41	1.2598	1994	-666	-256.9	515960553	4.69357	207	4.52587	219	133.234	-477.56	-506	-863	1082	86.9366
370	F	N	67	N	N	T2	M1	IV		0.6	8.89	19.62	14.95	0.14	Adenocarcinoma								0.584406	0.35127	20.7671	59.1202	53.7587	70.5762	71.6101	75.6108	18817.5	34.5502	0.330767	10343.5	0.549678	19219	-88	99	145855652	3.68249	90	7.72602	341	61.666	6.76789	16	-656	997	38.0022
371	M	N	57	Y	N	T3	M1	IV		1.6	8.4	5.87	11.36	0.14	Squamous cell carcinoma								0.806676	0.771193	13.9818	18.1301	21.4009	22.6716	18.868	22.8692	2460.75	14.6251	0.617286	1427.94	0.580285	2485	-598	-157.4	480501674	4.70096	221	3.08503	171	134.76	-405.926	-436	-801	972	93.8517
372	F	N	54	N	N	T2	M1	IV							Adenocarcinoma	-	-	-		-	0.2		0.581471	0.445608	8.95864	20.1043	21.587	23.1948	25	28.178	957.125	11.6901	0.49298	952.724	0.995402	997	-172.4	123	17026163	4.2183	121	5.86523	330	92.6176	-12.6028	8	-624	954	54.5095
373	M	N	77	Y	Y	T1	M1	IV		2.2					Squamous cell carcinoma								0.702209	0.397439	5.08952	12.8058	10	13.4164	11.1803	14.9666	165.167	8.99234	0.405373	359.124	2.17431	189	-683.4	-193.6	51277827	4.67071	244	3.38465	174	152.84	-483.878	-526	-861	1035	107.187
374	M	N	76	Y	N	T1	M1	IV		563				0.39	Adenocarcinoma								0.816188	0.735167	11.0904	15.0855	19.6977	20.2485	20.0998	23.3452	1181.88	12.3126	0.503956	1072.69	0.907614	1215	-307.6	58	33858037	4.27815	171	3.74838	191	113.841	-84.065	-39	-639	830	76.7057
375	F	N	55	N	N	T1	M0	IB							Adenocarcinoma	+	+	+		-	0.2		0.648895	0.412144	31.0129	75.2478	78.5659	68.3278	90.8767	90.8767	72031.3	48.8279	0.302031	27719.1	0.384821	72122.9	4	51	376548210	1.78785	22	8.07109	97	15.6568	27.9286	31	-92	189	9.55253
376	M	N	66	N	N	T2	M0	IB		4.1	17.24	20.91		0.6	Adenocarcinoma	+	+	+		-	0.2		0.833736	0.654345	38.8944	59.4402	72.6345	80.7982	75.5606	82.9491	64529.9	49.5575	0.230412	33766.5	0.52327	65312.1	-325.2	98	6168959952	4.32512	150	3.56882	599	119.18	-50.726	-6	-477	1076	74.4527
377	F	N	77	N	N	T1	M0	IA		1.6	3.67		12.25	0.24	Adenocarcinoma	+	+	+		-	0.2		0.917905	0.665422	6.18386	9.29315	14.6715	16.6216	16.8905	16.8905	221.245	8.53023	0.511546	345.819	1.56306	232.826	-185	40.6	4959233	3.62712	114	2.6323	77	68.6554	-55.5649	-38	-266	343	49.3985
378	F	N	75	N	N	T3	M0	IA		14.7					Adenocarcinoma	+	+	+		-	0.2		0.890819	0.433327	15.2193	35.122	43.9676	41.2931	48.9179	48.9179	7952.61	31.2873	0.415532	4636.81	0.583056	7976.42	-61	115	206851347	3.56973	90	5.01222	341	56.2099	28.277	32	-540	881	37.7231
379	F	N	78	N	N	T2	M0	IB		1.5			9.58	0.46	Adenocarcinoma	+	+	+		-	0.5		0.720163	0.572522	9.47314	16.5463	20.0123	24.7904	21.6754	26.2618	762.315	11.9161	0.324019	1245.48	1.63381	793.37	-74	88	7401508	3.1576	93	2.06345	127	49.3074	5.02934	3	-99	226	37.7805
380	M	N	72	N	N	T4	M0	IA		369.4	615.5	90.86	16.6		Adenocarcinoma	+	+	+		-	0.4		0.771005	0.404462	18.1503	44.8752	53.4918	55.4543	56.9915	60.7626	14106.7	34.599	0.316141	8930.73	0.633083	14234.2	-187	105	684719663	4.09715	128	3.60162	247	86.9189	-18.6711	1	-360	607	55.8474
381	M	N	77	N	N	T2	M1	IV							Other	+	+	+		-	0.2		0.722515	0.369942	7.98778	21.592	24.692	29.161	22.7237	30.2928	677.157	15.6005	0.23742	1570.7	2.31955	728.054	-75	220	22990638	3.89846	166.75	2.1489	294	88.9467	59.335	46.5	-98	392	68.0661
382	F	N	50	N	N	T1	M0	IA		1.8			6.69	0.33	Adenocarcinoma	+	+	+		-	0.5		0.72806	0.56704	11.1589	19.6792	25.1674	22.0786	23.224	26.5064	1160.41	14.3276	0.223027	2394.42	2.06343	1205.48	-580	-254	744976922	4.05798	163	5.21196	193	106.013	-445.228	-485	-600	793	70.345
383	F	N	36	N	N	T1	M0	IA							Adenocarcinoma	+	+	+		-	0.5		0.875476	0.774934	42.5815	54.9486	77.3143	74.5667	72.7696	77.7482	69458.6	48.1061	0.249267	32782.1	0.471965	69486.9	-42	102	1101092357	3.15115	76	2.51821	172	44.0389	29.7211	29	-88	260	31.8382
384	M	N	52	Y	N	T4	M0	IV		1.8			10.81		Adenocarcinoma	+	+	+		-	0.4		0.823028	0.641209	21.4572	33.4636	41.0702	43.0889	42.6688	44.034	12295.8	27.5415	0.356466	7227.21	0.587779	12299.6	-61	109	207092150	3.40569	89	2.86122	157	52.5577	26.3146	31	-166	323	37.0575
385	M	N	88	N	N	T4	M0	IV		13.8	51.09		8.62	23.24	Adenocarcinoma	+	+	+		-	0.2		0.95003	0.635843	20.0125	31.4739	37.4254	40.5299	47.3854	51.9642	6797.62	29.9012	0.179595	9662.6	1.42147	7349.7	-36	139	114270493	3.31569	96	2.35083	164	52.9904	56.1834	62	-100	264	39.3169
386	F	N	74	Y	N	T4	M0	IV		131.5	743.2		19.51	0.27	Adenocarcinoma	+	+	+		-	0.1		0.730204	0.554461	22.174	39.992	54.3961	36.0785	49.7664	56.3893	8484.35	29.2023	0.112519	17878.8	2.10727	8938.99	-38	81	54384092	2.73572	65	2.6837	92	36.4998	29.3869	38	-89	181	26.8381
387	F	N	47	N	N	T2	M0	IB		5.4	33.3		14.22	0.46	Adenocarcinoma	+	+	+		-	0.05		0.644801	0.466883	77.9432	166.944	186.87	198.16	145.988	198.79	804840	107.646	0.183469	228066	0.283368	792475	12	50	2254529177	1.38357	18	5.45916	92	11.7467	32.8598	36	-130	222	7.62047
388	F	N	52	N	N	T1	M0	IA					12.65	0.35	Adenocarcinoma	+	+	+		-	0.2		0.453949	0.133889	10.0798	75.285	40.935	86.2778	84.2597	87.8265	14825.1	34.1755	0.289113	10094.4	0.6809	14835.4	-1	107	144538814	2.78609	57	3.11706	230	33.3269	53.0462	51	-32	262	23.7173
389	F	N	73	N	N	T2	M0	IB		2.2			9.59	0.27	Adenocarcinoma	+	+	+		-	0.5		0.846843	0.746399	3.69767	4.95402	5.8845	5.8845	5.27802	6.22394	45.7137	4.19528	0.722428	85.5829	1.87215	47.3121	-748.9	-160.1	44563895	4.77148	379.25	2.14018	35	196.508	-499.534	-550	-805	840	153.45
390	M	N	78	Y	Y	T3	M0	IB		6.8	12.98	3.2		0.51	Adenocarcinoma	+	+	+		-	0.1		0.78156	0.654733	4.07399	6.22237	7.81032	7.33058	5.57263	8.07182	63.9752	4.86315	0.603548	128.168	2.0034	70.6484	-781	-212	80547987	4.56162	341	2.92214	56	186.369	-560.701	-650	-799	855	137.241
391	F	N	42	N	N	T1	M0	IA		2.4			8.71	0.96	Adenocarcinoma	+	+	+		-	0.4		0.789849	0.540806	5.04235	9.32377	10.2174	10.2423	10.6757	12.0977	141.335	7.36437	0.404136	324.681	2.29724	148.99	-671.9	-114.3	142939018	4.67417	302.5	2.74999	96	170.926	-445.49	-502.5	-700	796	125.163
392	F	N	53	N	N	T2	M0	IB			6.93	20.48	8.46	0.21	Adenocarcinoma	+	+	+		-	0.5		0.82128	0.54059	48.1515	89.0721	88.5099	120.516	114.179	122.445	175410	73.1531	0.242799	62412.8	0.355811	173693	10	64	1091759698	1.91301	27	12.3953	78	17.9344	37.5269	41	-162	240	11.5035
393	M	N	74	N	N	T4	M0	IV		166.8			11.89	1.06	Adenocarcinoma	+	+	+		-	0.6		0.709689	0.616634	19.0261	30.8548	39.8578	40.7555	37.6472	46.1039	6233.2	21.8973	0.25199	6499.91	1.04279	6242.09	-58	146	164213108	3.63783	108	3.46401	467	63.5781	41.4536	35	-98	565	44.9759
394	M	N	51	N	N	T2	M0	IB		881.9	980.7		10.94	0.53	Adenocarcinoma	+	+	+		-	0.4		0.755886	0.701398	11.7811	16.7967	19.8512	23.1861	17.6677	24.9916	1277.29	12.6964	0.458494	1241.68	0.972121	1309.15	-171.6	94	35985634	3.94823	119	2.98524	323	77.6142	-20.3663	-7	-262	585	52.1637
395	M	N	67	Y	N	T2	M1	IV		6.3	269.9		8.03	0.11	Adenocarcinoma	+	+	+		-	0.7		0.784409	0.614304	37.2602	60.6544	81.0142	63.3432	84.6715	94.2704	53645.6	47.5779	0.220001	31266.7	0.582838	54073.8	-315	98	5905120591	4.23861	139	3.88042	247	118.172	-43.9679	6	-500	747	71.6582
396	F	N	35	Y	N	T1	M0	IA		0.9			7.85		Adenocarcinoma	+	+	+		-	0.05		0.861343	0.803316	29.0082	36.1106	44.4711	46.5647	45.2205	48.4893	21163.8	31.1037	0.437372	8459.85	0.399732	21194.1	-233	127	1848748765	4.40036	152	4.80804	247	112.139	-31.6375	-2	-550	797	66.4854
397	M	N	68	Y	Y	T1	M0	IA		7.2			10.81	0.61	Adenocarcinoma	+	+	+		-	0.6		0.91785	0.628944	8.26045	13.1338	18.218	17.469	16.9112	19.1511	765.866	12.0549	0.565303	716.096	0.935015	782.261	-413	-10.3	136308363	4.34374	213	2.66986	204	119.856	-244.911	-275	-450	654	87.5094
398	F	N	76	N	N	T4	M1	IV		8			13.15	0.34	Adenocarcinoma	+	+	+		-	0.6		0.759687	0.569699	11.6607	20.4681	22.284	27.2412	26.7969	28.6225	2331.84	15.5494	0.494661	1719.13	0.737242	2382.25	-284	103	174185672	4.38983	179	2.73837	247	112.923	-55.6658	-27	-400	647	78.7058
399	F	N	75	N	N	T4	M1	IV							Squamous cell carcinoma	+	+	+		-	0.05		0.624978	0.503019	25.3584	50.4123	55.1439	52.9124	49.5907	69.5376	18461.6	31.5066	0.220154	15344	0.831128	18363.7	-240	118	1224598079	4.21973	144	3.80344	191	103.386	-22.9872	9	-428	619	65.091
400	F	N	67	N	N	T4	M0	IV		1	10.09	5.77	7.84	0.1	Adenocarcinoma	+	+	+		-	0.1		0.861272	0.724931	39.789	54.8866	81.4977	65.843	69.9944	84.5561	47286.5	47.2723	0.182385	34672.6	0.733245	46209.6	-271	105	2947533383	4.19432	143	4.14786	156	107.97	-36.1995	2	-480	636	66.512
401	F	N	61	N	N	T1	M0	IV		1			8.67	0.55	Adenocarcinoma	+	+	+		-	0.7		0.91376	0.736286	21.5202	29.228	38.2189	35.289	36.1547	40.0002	10737.4	26.7074	0.432498	5442.1	0.506836	10779.2	-180	142	466837373	4.33082	159	3.50321	247	100.898	-11.791	2	-420	667	67.7315
402	F	N	56	N	N	T1	M0	IA		4.7			7.76	0.19	Adenocarcinoma	+	+	+		-	0.1		0.906647	0.773275	5.80972	7.51314	9.29314	8.71197	8.48006	9.51077	177.984	6.81177	0.631836	242.178	1.36067	183.882	-617	-121	107374116	4.77319	274	2.4681	226	151.127	-373.13	-376	-678	904	112.366
403	M	N	63	N	N	T1	M0	IA							Adenocarcinoma	+	+	+		-	0.2		0.647978	0.556381	26.3263	47.317	46.1923	44.9899	53.0712	58.0445	24187.2	30.6604	0.413099	9790.83	0.404794	24360.8	-161	115	1220504630	4.1005	115	5.93007	345	89.5378	-8.67364	15	-500	845	50.2827
[truncated: 824 more columns]
